1 Progress toward the identification and stacking of crucial domestication traits in  
2 pennycress

3

4 **Authors**

5 Ratan Chopra<sup>1</sup>, Evan B. Johnson<sup>1†</sup>, Ryan Emenecker<sup>1†</sup>, Edgar B. Cahoon<sup>2</sup>, Joe  
6 Lyons<sup>3</sup>, Daniel J. Kliebenstein<sup>4</sup>, Erin Daniels<sup>1†</sup>, Kevin M. Dorn<sup>1†</sup>, Maliheh  
7 Esfahanian<sup>5</sup>, Nicole Folstad<sup>1</sup>, Katherine Frels<sup>6</sup>, Michaela McGinn<sup>5</sup>, Matthew Ott<sup>6</sup>,  
8 Cynthia Gallaher<sup>7</sup>, Kayla Altendorf<sup>6</sup>, Alexandra Berroyer<sup>5</sup>, Baraem Ismail<sup>7</sup>, James  
9 A. Anderson<sup>6</sup>, Donald L. Wyse<sup>6</sup>, Tim Umaslov<sup>3</sup>, John C. Sedbrook<sup>5</sup>, and M.  
10 David Marks<sup>1\*</sup>

11

12 **Affiliations**

13

14 <sup>1</sup> Department of Plant and Microbial Biology, University of Minnesota, St. Paul,  
15 MN 55108 USA.

16 <sup>2</sup> Center for Plant Science Innovation and Department of Biochemistry, University  
17 of Nebraska-Lincoln, Lincoln, NE 68588 USA

18 <sup>3</sup>Covercress, Inc. St. Louis, MO 63132 USA

19 <sup>4</sup>Department of Plant Sciences, University of California - Davis, Davis, CA 95616  
20 USA

21 <sup>5</sup>School of Biological Sciences, Illinois State University, Normal, IL 61790 USA

22 <sup>6</sup> Department of Agronomy and Plant Genetics, University of Minnesota, St. Paul,  
23 MN 55108 USA.

24 <sup>7</sup>Food Science and Nutrition, University of Minnesota, St. Paul, MN 55108 USA

25

26 \* **Correspondence to:** M. David Marks – [marks004@umn.edu](mailto:marks004@umn.edu)

27 † **Present addresses:**

28 E.B.J. Renewable and Sustainable Energy Institute, University of Colorado,  
29 Boulder, CO 80309

30 R.E. Department of Biology, Washington University, St. Louis, MO 63130

31 E.D. Salk Institute for Biological Studies, La Jolla, CA 92037

32 K.M.D. Department of Plant Pathology, Kansas State University, Manhattan, KS  
33 66506

34

35

36

37 **Abstract**

38

39 The oilseed species *Thlaspi arvense* (pennycress) is being domesticated as a  
40 new crop that can provide both important ecosystem services and intensify  
41 farmland output. Through the use of high throughput sequencing and  
42 phenotyping, along with classical mutagenesis key traits needed for pennycress  
43 domestication have been identified. Domestication traits identified herein include  
44 reduced pod shatter, early maturity, reduced seed glucosinolate levels, and  
45 improved oil fatty acid content. By taking advantage of pennycress' close genetic  
46 relationship with *Arabidopsis thaliana*, the causative mutations responsible for  
47 each of these traits have been identified. These mutations have been used to  
48 develop molecular markers to begin to stack the traits into individual lines.

49

50

51  
52 Tremendous gains in crop yields have been achieved through a combination of  
53 increased fertilizer use, crop breeding, and improved agronomic practices (2014).  
54 However, the long-term sustainability of crop production using current farming  
55 practices is threatened by several factors. In intensive cropping systems, such as  
56 the corn-soybean rotation in the Midwestern United States, only 40-60% of the  
57 applied nitrogen fertilizer is taken up by plants (Wortmann *et al.* 2011). Much of  
58 the remaining nitrogen is released as greenhouse gases or pollutes surface and  
59 ground waters resulting in the eutrophication of streams and lakes, the creation  
60 of dead zones in coastal regions, and the contamination of wells in rural  
61 communities (Robertson and Vitousek 2009). Another looming threat to  
62 agricultural production is the emergence of herbicide tolerant weeds, including  
63 weeds tolerant to glyphosate (Heap 2014). The use of glyphosate resistant crops  
64 over the past twenty-five years enabled no-till or reduced-till agriculture that  
65 helped to reduce soil erosion (Price *et al.* 2011). Due to the increasing  
66 prevalence of herbicide resistant weeds farmers may return to deep tillage to  
67 reduce weed pressures, which will hasten soil erosion (Price, *et al.* 2011).

68 To confound the above issues, the world population is expected to grow to  
69 over nine billion by the year 2050 (Gerland *et al.* 2014). To feed this growing  
70 population, it has been estimated that food production must increase by an  
71 average of 44 million metric tons per year (Tester and Langridge 2010). In  
72 addition, global warming due the release of CO<sub>2</sub> from fossil fuels is posing  
73 another threat (Anderson *et al.* 2016). To reduce this threat demand is increasing  
74 for plant-based renewable feedstocks for the production of biofuels and  
75 bioproducts (Ho *et al.* 2014). However, this leads to the concern that using  
76 traditional crops for biofuel and bioproducts formation will threaten future food  
77 security (Harvey and Pilgrim 2011). One solution is to intensify farmland output  
78 (Tilman *et al.* 2011).

79 The deployment of cover crops during the fallow period between the  
80 growth of summer crops can improve water quality and reduce the threat of  
81 herbicide tolerant weeds (Dunn *et al.* 2016). However, traditional cover crops

82 such as winter rye often need to be terminated before maturity to allow the  
83 planting of summer crops (Roesch-McNally *et al.* 2017). Thus, such cover crops  
84 do not enhance food or feedstock production. The winter annual weed,  
85 pennycress (*Thlaspi arvense* L. also known as field pennycress and referred to  
86 as “pennycress” hereafter), is being domesticated as a new alternative cover  
87 crop (DeHaan *et al.* 2016, Isbell 2009, Jordan *et al.* 2007, Phippen and Phippen  
88 2012, Sedbrook *et al.* 2014). As a winter cover, pennycress can utilize excess  
89 nitrates before they escape into the environment and can suppress the growth of  
90 spring weeds (Johnson *et al.* 2015, Johnson *et al.* 2017, Weyers *et al.* 201).  
91 Importantly, pennycress can be harvested for its oilseeds (Fan *et al.* 2013, Moser  
92 2012, Moser *et al.* 2009a, Moser *et al.* 2009b). Thus, pennycress has the  
93 potential to intensify farm output by producing a new crop on land that is  
94 temporally held fallow, such as much of the tens of million hectares of land  
95 currently undergoing the corn/soybean rotation in the Midwestern United States  
96 (Hart 2015).

97 The selection of pennycress as a target for domestication as a new cover  
98 crop was based on positive natural traits such as extreme winter hardiness (-  
99 25°C), high seed yields for a wild species (1,000-2,000 kg/ha), and seeds rich in  
100 oil (30-35%) and protein (25-27%) (Warwick *et al.* 2002). Pennycress produces  
101 an oilseed suitable for making biofuels and bioproducts (Fan, *et al.* 2013, Moser  
102 2012, Moser, *et al.* 2009a). However, the oil and associated seed meal are not  
103 suitable for human or animal consumption. The oil is enriched with erucic acid,  
104 which has been considered to be unsuitable for human consumption (Bell 1982).  
105 In addition, the seeds contain glucosinolates, which are considered to be anti-  
106 nutritional for humans and non-ruminant animals (Wittkop *et al.* 2009).  
107 Furthermore, the mature seedpods are prone to breakage or shatter resulting in  
108 pre-harvest seed loss. Lastly, in many regions, pennycress matures late enough  
109 to cause delays in the planting of summer crops. Successful domestication of  
110 pennycress requires the elimination of these negative traits.

111 Herein, we show that the rapid domestication of pennycress can be  
112 facilitated by its close relationship to the model plant *Arabidopsis* (Sedbrook, *et al.*

113 2014). Like *Arabidopsis*, pennycress is self-fertile and has a relatively small non-  
114 repetitive diploid genome. Genome sequencing and analyses revealed a mostly  
115 one-to-one functional correspondence between single *Arabidopsis* genes and  
116 single pennycress ortholog genes (Chopra *et al.* 2018b, Dorn *et al.* 2013, Dorn *et*  
117 *al.* 2015). Importantly and directly related to the domestication of pennycress,  
118 recessive *Arabidopsis* mutants have been described that eliminate weedy and  
119 other agronomically undesirable traits (Provar *et al.* 2015, Sedbrook, *et al.* 2014).  
120 The goal of this study was to identify similar mutants in pennycress with traits  
121 considered to be crucial to the domestication of any plant species (Abbo *et al.*  
122 2014). Using classical mutagenesis, we describe the isolation and  
123 characterization of pennycress mutations conferring crucial domestication traits  
124 such as early flowering/maturity, reduced seedpod shatter, reduced  
125 glucosinolates, and reduced erucic acid along with reduced polyunsaturated fatty  
126 acids resulting in the creation of canola-like high oleic oil. The causative  
127 mutations responsible for each of these traits were identified. These mutant  
128 sequences were used to develop molecular markers that have been successfully  
129 employed to stack all of the mutations into a single line.

130

## 131 **Results**

132

### 133 **Early flowering/maturing pennycress**

134 For pennycress to fit between the rotations of traditional summer crops it needs  
135 to mature in the spring without disrupting the planting of the following summer  
136 crop (De Bruin and Pedersen 2008). To identify *Arabidopsis*-like mutants that  
137 flower and mature early, pools of mutagenized population of M<sub>2</sub> seeds were  
138 planted in the field space adjacent to the University of Minnesota St Paul campus  
139 (Chopra, *et al.* 2018b). During the following spring, plants in the field that  
140 flowered early were tagged and followed through to maturity. Sixty-one  
141 independent isolates that flowered and matured early compared to the wild-type  
142 were identified during the primary screen. Nineteen of the 61 early flowering  
143 mutants were confirmed for the inheritance of earliness traits in the following  
144 generation. We further focused our efforts on one line, A7-25, that flowered and

145 began producing seedpods 10-14 days earlier than the wild-type (compare **Figs.**  
146 **1a, b**). In another site-year in St. Paul, this mutant line matured approximately  
147 one week ahead of the wild-type allowing an early harvest in the field conditions  
148 while demonstrating normal plant stature and yield (**Table. S1**)

149 To test the hypothesis that the A7-25 mutant carried a mutation in a  
150 previously characterized in Arabidopsis gene, whole-genome sequencing (WGS)  
151 was performed. It was found that A7-25 contains a mutation in the candidate  
152 pennycress ortholog of the Arabidopsis *EARLY FLOWERING 6 (ELF6)* (referred  
153 to as *Ta-ELF6-1* in **Fig. 1c**, and **Data S1-3**) (Jeong *et al.* 2009, Noh *et al.* 2004).  
154 In Arabidopsis, ELF6 activity de-represses the expression of the floral inhibitor  
155 *FLOWERING LOCUS C (FLC)* gene by removing methyl groups from lysine 27  
156 of histone 3 proteins associated with the *FLC* locus (Crevill n *et al.* 2014). *FLC*  
157 controls flowering time in pennycress (Dorn *et al.* 2017). The reduced  
158 demethylase activity in *elf6* mutants results in reduced *FLC* expression, which  
159 hastens flowering. As shown in **Fig. 1c** and **Data S3** the mutation in *Ta-ELF6-1*  
160 results in the substitution of a tyrosine (Y) residue for a conserved histidine (H)  
161 (Noh, *et al.* 2004). This substitution is predicted to disrupt the formation of the  
162 iron-binding site in the Jumonji C (JmjC) domain that is required for histone 3  
163 demethylase activity in many plant species (Lu *et al.* 2008). To determine if the  
164 early flowering phenotype in pennycress co-segregates with the mutation, an F<sub>2</sub>  
165 population derived from a cross between the mutant and wild-type (Ames23761)  
166 was characterized. Statistical analysis of each genotype class in the F<sub>2</sub>  
167 population showed that plants homozygous for the *Ta-elf6-1* mutation flowered  
168 earlier than either homozygous wild-type or heterozygous plants (*p*-values  
169 0.0002 and 0.0021, respectively (**Fig. 1d**).

170 All studies with Arabidopsis on the effects of the *elf6* mutation on *FLC*  
171 expression have been under controlled growth conditions. To determine if a  
172 similar phenomenon occurs in field grown pennycress, we analyzed the effect of  
173 the mutation on pennycress *FLC* expression prior to vernalization in the fall. As  
174 shown in (**Fig. 1e**), *FLC* expression was reduced by 30.5±0.09% in the early  
175 flowering A7-25 line compared to the wild-type grown in the same trial. These

176 results show that *ELF6* functions the same under field conditions for pennycress  
177 as under controlled growth conditions for *Arabidopsis*.

178

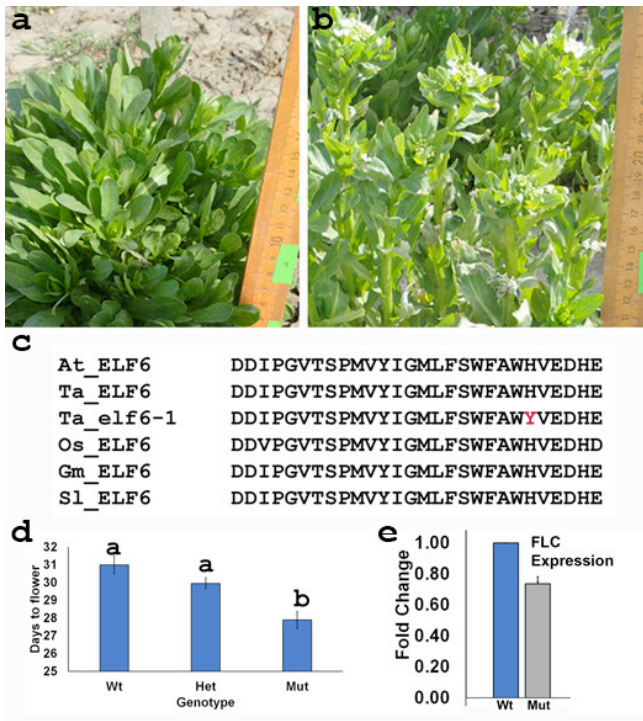

179

180 **Figure 1. Early flowering pennycress mutant.** Images of field grown wild-type (a) and  
181 early flowering *Ta-elf6-1* mutant (b) plants taken on the same date. (c) Comparison of  
182 amino acid sequences within the JmjC domain of *ELF6*-like genes highlighting the  
183 residue altered in the pennycress mutant (red). (d) Average days to flowering in  
184 greenhouse conditions for an F<sub>2</sub> population derived from a cross between wild-type and  
185 *Ta-elf6-1* plants. Allele-specific markers were used to assess the *elf6-1* genotype of  
186 members in the F<sub>2</sub> population. Note: Letters indicate significant differences based on  
187 pair-wise Tukey test. (e) qPCR analysis of *FLC* expression in wild-type and early  
188 flowering *Ta-elf6-1* mutant plants using RNA from field grown plants collected in the fall  
189 of 2017. *FLC* expression values were normalized using a ubiquitin probe (error bar  
190 denotes standard deviation). Abbreviations: At – *Arabidopsis thaliana*, Os – *Oryza sativa*  
191 (rice), Gm – *Glycine max* (soybean), Sl – *Solanum lycopersicum* (tomato).

192

### 193 **Reduced seedpod shatter pennycress**

194 Pennycress seedpods exhibit premature breakage by wind or during mechanical  
195 harvest resulting in yield losses of over 50%. To identify pennycress mutants with

196 reduced seedpod shatter, fields of M<sub>2</sub> plants maintained past peak maturity were  
197 screened for individuals exhibiting reductions in pod breakage or shatter  
198 (compare **Figs. 2a, b**). Five individual recessive mutants have been identified,  
199 along with a sixth line identified in a growth room screen, in which the trait  
200 successfully passed through multiple generations.

201 Pennycress produces a flat circular seedpod called a silicle that has a  
202 visibly distinct morphology compared to the long rod-shaped seedpods known as  
203 siliques produced by *Arabidopsis* and other members of the Brassicaceae plant  
204 family (**Fig. 2c**). Therefore, it was unknown if genes required for pod formation in  
205 *Arabidopsis* would be the same as those controlling pod formation in pennycress.  
206 To determine if the pennycress mutants contained mutations in genes known to  
207 be associated with the formation of the separation zone in *Arabidopsis*, which  
208 mediates pod breakage, the six lines were subjected to WGS. Three of the lines  
209 were found to have mutations in the pennycress candidate ortholog of the  
210 *Arabidopsis* *INDEHISCENT* (*IND*) gene (**Fig. 2d, Data S1-3**) (Liljgren *et al.*  
211 2004). The analysis of the remaining three lines will be considered elsewhere.  
212 *IND* encodes a *bHLH* transcription factor that regulates the formation of  
213 separation layers of cells contained within the valve margin, which flanks the  
214 septum (also called a replum) that divides the seedpod into two halves  
215 (Liljgren, *et al.* 2004). The *Ta-ind-1* allele contains a mutation outside of a highly  
216 conserved bHLH domain, while the *Ta-ind-2* flanks this region and *Ta-ind-3* has a  
217 mutation in the conserved bHLH domain (**Fig. 2d and Table S2**). The seedpods  
218 of both *Ta-ind-2* and *Ta-ind-3* failed to cleanly break on harvest signifying non-  
219 functional dehiscence zones. However, *Ta-ind-1* seedpods did break at the  
220 septum to release seeds on harvest, but compared to wild-type, required more  
221 force to break open the seedpods (**Fig. 2d**). As expected, *Ta-ind-1* retains a  
222 separation layer (**Fig. 2e**) that is not present in *Ta-ind-2* or *Ta-ind-3* (**Fig. 2f** and  
223 **Fig. S1**). The finding of three independent pennycress *ind* alleles showing  
224 reduced pod breakage strongly supports the causation of these mutations of the  
225 observed phenotype. Of the three alleles, *Ta-ind-1* should have the most



226 agronomic utility, as the shatter-less phenotype of *Ta-ind-2* and *Ta-ind-3* reduces  
227 seed harvestability with conventional combines.

228

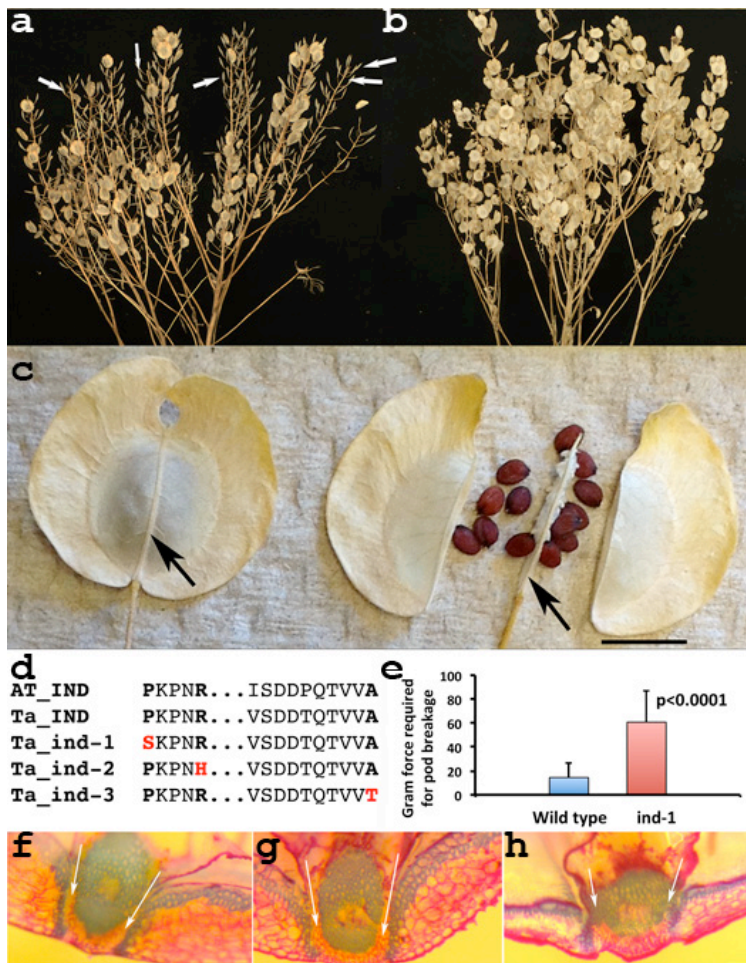

229

230 **Figure 2. Isolation and characterization of pennycress seed pod mutants.** (a) Field  
231 grown wild-type plant compared to a reduced shatter mutant plant (b). (c) An intact  
232 seedpod compared to a broken seedpod with released seeds (both are wild-type). The  
233 arrows show the septum of an intact pod (left) and the septum structure that remains  
234 after pod shatter. The arrows highlight the septum remaining after pod shatter.  
235 (d) IND amino acid sequences derived from Arabidopsis (At-IND) and wild-type  
236 pennycress (Ta-IND) compared to three mutant pennycress alleles (*ind-1*, *ind-2* and *ind-*  
237 *3*). The red letters highlight the amino acid substitutions. (e) Gram force needed to break  
238 open pods from wild-type and *ind-1* plants. Std. dev. error bars are shown. Freehand  
239 sections through wild-type (e), *ind-1* (f), and *ind-2* (g) seedpods. The arrows highlight the  
240 separation layers in wild-type and *ind-1*. This layer is missing in *ind-2* and *ind-3* (Fig. S2).

241 The darker stained blue regions highlight lignified cell layers. The size bars in **c** and **h**  
242 represent 0.5 cm and 50  $\mu\text{m}$ , respectively.

243

244

### 245 **Low glucosinolate pennycress**

246 Like *Arabidopsis* and other brassicas, pennycress seeds contain  
247 glucosinolates (~100  $\mu\text{mol/g}$  of seeds), almost all in the form of sinigrin (Warwick,  
248 *et al.* 2002). Most of the glucosinolates remain in the meal after the extraction of  
249 oil from the seeds. This seed meal has added value if it can be used as an  
250 animal feed supplement, however high amount of glucosinolates in the meal can  
251 negatively affect animals (Wittkop, *et al.* 2009). Thus, a search for pennycress  
252 lines with reduced glucosinolates was conducted. As described in a previous  
253 report, 15,000 lines were scanned using Near Infra-Red Spectroscopy (NIRS) to  
254 estimate seed composition traits in the intact seeds (Chopra *et al.* 2018a). The  
255 analysis of these scans identified one line predicted to have very low  
256 glucosinolate levels, which was confirmed via wet lab assays for total seed  
257 glucosinolates (**Fig. 3a**). Interestingly, numerous individuals indicated that the  
258 mutant seeds have a pleasant, nutty flavor that has not previously been reported  
259 for seeds from plants in the Brassicaceae plant family. Seeds from the  
260 Brassicaceae family typically are characterized to have flavors that range from  
261 bitter, mustardy, garlicky, to hot. Hereafter, this pennycress mutant is referred to  
262 as “nutty”. The leaves of nutty also lacked the garlicky smell that accounts for  
263 pennycress also being called “stinkweed”.

264 In *Arabidopsis*, the biochemical pathway leading to the formation of  
265 various glucosinolates including sinigrin has been well characterized (Sonderby *et al.*  
266 *et al.* 2010). Thus, we conducted WGS on nutty and searched for a mutation in a  
267 gene known to be involved in glucosinolate biosynthesis in *Arabidopsis*. This led  
268 to the identification of a pennycress mutation in a gene that is equally related to a  
269 family of three tandemly linked genes in *Arabidopsis* called *ALKENYL*  
270 *HYDROXALKYL PRODUCING 1, 2, and 3 (AOP1,2,3)* (Kliebenstein *et al.* 2001).  
271 The analysis of an  $F_2$  from a cross between wild type and mutants showed that

272 the reduced glucosinolate nutty phenotype was tightly linked to the mutation in  
273 the AOP-like sequence (**Fig. S2**). HPLC analysis of glucosinolates from nutty  
274 confirmed the reduction in sinigrin and also revealed a mild excess accumulation  
275 of 3-methylsulfinylpropyl and 3-methylthiopropyl glucosinolates, which are  
276 precursors to sinigrin in the biosynthetic pathway, supporting the hypothesis that  
277 the pennycress *AOP-like* gene encodes an enzyme with *Arabidopsis AOP2*  
278 alkenyl producing activity converting 3-methylsulfinylpropyl glucosinolate to  
279 sinigrin (**Fig. 3d**) (*Kliebenstein, et al. 2001*). Thus, the mutant gene was named  
280 *Ta-aop2-1*. Of note, all three glucosinolates shown in the HPLC profile shown in  
281 **Fig. 3c** can be detected in the glucosinolate profile shown in **Fig. 3a**. If there was  
282 a simple blockage in the pathway one would predict that the total levels of  
283 glucosinolates would be the same in both mutant and wild type, however, there is  
284 a clear reduction in glucosinolates in nutty. Additional work is needed to further  
285 understand the molecular mechanisms responsible for the overall reduction in  
286 glucosinolates in this mutant.

287

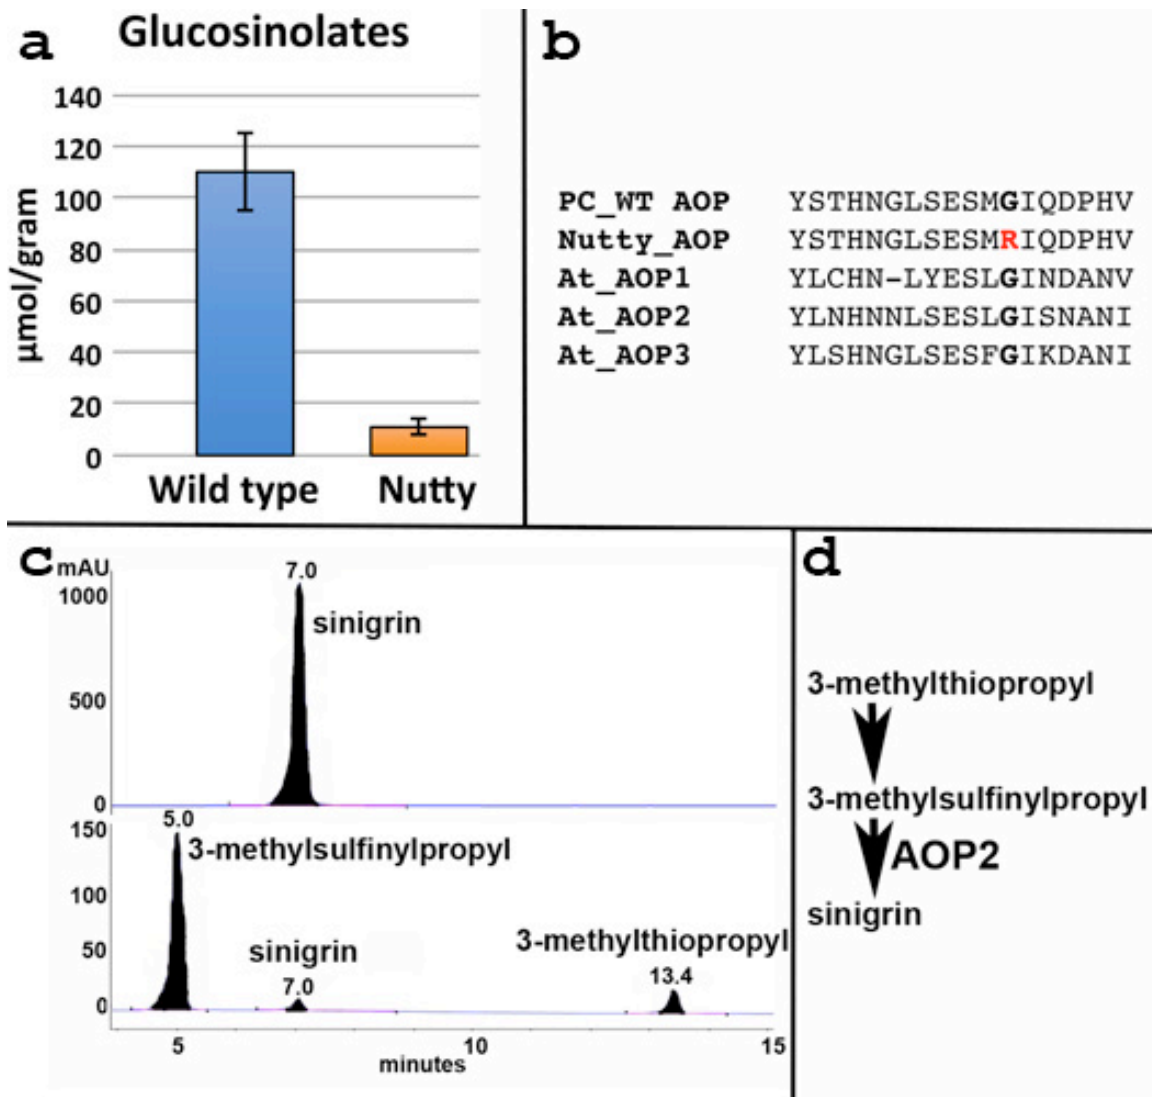

288  
289

290 **Figure 3. Comparison of glucosinolates in wild-type and Nutty (*aop2-1*) mutant**  
 291 **pennycress.** (a) Spectrometric quantitation of total glucosinolates in wild-type and the  
 292 nutty mutant. Error bars highlight Std. Dev. (b) AOP-like amino acid sequences derived  
 293 from Arabidopsis (At-AOP 1 through 3) and wild-type pennycress AOP2 (PC\_WT AOP)  
 294 compared to the nutty mutant (Nutty-AOP). (c) HPLC analysis of desulfated  
 295 glucosinolates from wild-type and the nutty mutant, top and bottom, respectively. Peaks  
 296 are labeled with compound name and the time (minutes) of flow through the HPLC. (d)  
 297 Terminal biochemical steps leading to the synthesis of the glucosinolate sinigrin. The  
 298 step mediated by the enzyme encoded by *AOP2* in Arabidopsis is shown.

299  
300  
301

### Improving fatty acid composition of pennycress

302           The fatty acid composition of pennycress oil is similar to that of rapeseed  
303 containing over 35% erucic acid (**Fig. 4a**) (Claver *et al.* 2017, Moser, *et al.*  
304 2009a). Oils containing such high levels of erucic acid are not considered fit for  
305 human or animal consumption(Knutzen *et al.* 2016). Therefore, a search was  
306 made for lines with reduced erucic acid. This search was aided by the knowledge  
307 that in *Arabidopsis* and other species, the biosynthesis of erucic acid is mediated  
308 by a single enzyme, *FATTY ACID ELONGATION1 (FAE1)*, which in two steps  
309 converts oleic acid with eighteen carbons and one double bond (18:1) to erucic  
310 acid with twenty-two carbons and one double bond (22:1) (James *et al.* 1995).  
311 Similar to the detection of glucosinolates, the quantity of erucic acid along with  
312 other types of fatty acids can be estimated using NIRS(James, *et al.* 1995). Thus,  
313 the same 15,000 NIRS scans that were used to identify the reduced  
314 glucosinolate line were used to search for lines with reduced erucic acid. This  
315 analysis identified two independent lines with greatly reduced erucic acid. These  
316 results were verified via gas chromatography (GC), which showed that both lines  
317 only contained trace levels of erucic acid (**Fig. 4b**). The candidate pennycress  
318 *FAE1* alleles in these reduced erucic acid lines were amplified via PCR and  
319 sequenced. Both lines contained independent nonsense mutations leading to  
320 premature stops in the predicted pennycress *FAE1* protein sequences (**Data S1-**  
321 **3**). These results were further confirmed by WGS of these lines. The finding of  
322 two strong loss of function alleles for the candidate pennycress *FAE1* ortholog  
323 giving rise to the expected phenotypes strongly supports causation of the  
324 mutations.

325           Pennycress *fae1* mutants contain the desired reduction in erucic acid and  
326 a desirable elevation in oleic acid. They also accumulate higher levels of fatty  
327 acid with extra double bonds referred to as polyunsaturated fatty acids (PUFAs).  
328 In particular, linolenic acid with 3 double bonds (18:3) was elevated. This fatty  
329 acid belongs to the omega3 class of fatty acids, which are associated with  
330 reduced heart disease, reduced bone fracture risk, and in reduced childhood  
331 obesity (Perng *et al.* 2014, Rajaram 2014). However for many applications,  
332 PUFAs are not desirable as the extra double bonds reduce the stability of the oil,

333 thus shortening the shelf life of the products that contain the oil (Gordon 2001).  
 334 Therefore, a search was made for lines containing reduced levels of PUFAs  
 335 using the same NIRS screen. We identified two mutants with predicted  
 336 reductions in both linoleic and linolenic acids. These reductions were verified  
 337 using GC analysis (**Fig. 4c**). Both lines contained similar levels of erucic acid as  
 338 the wild-type, but the reductions in PUFA were compensated for by an increase  
 339 in oleic acid. The fatty acid profiles of these two lines resembled those from  
 340 *Arabidopsis reduced oleate desaturation1 (rod1)* mutants(Lu *et al.* 2009). This  
 341 was confirmed via the PCR amplification and sequencing of the candidate  
 342 pennycress genes (**Data S1-3**). These results were further confirmed by WGS of  
 343 these lines.  
 344  
 345

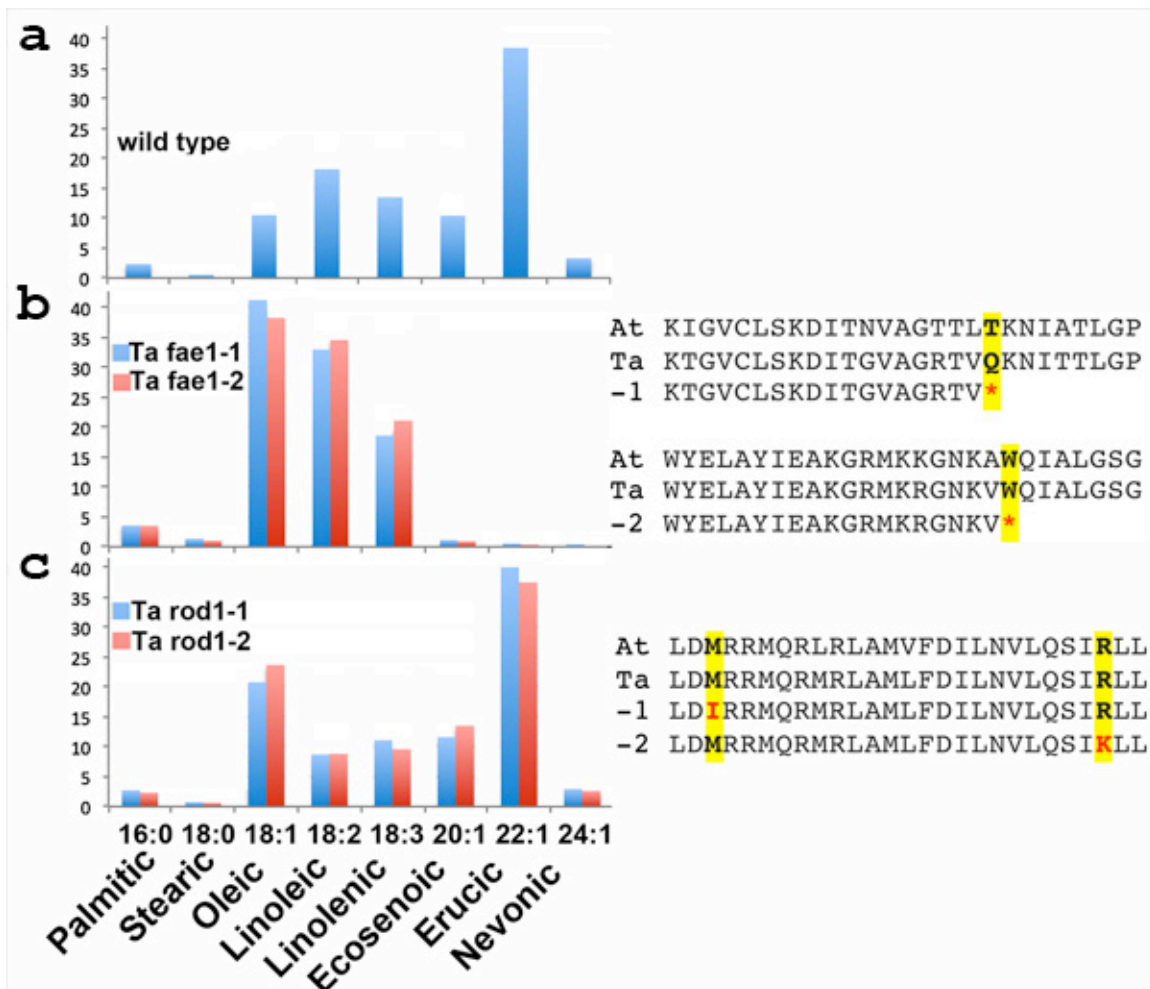

346

347

348 **Figure 4. Comparison of wild type fatty acid profiles compared to those of**  
349 **pennycress *fae1* and *rod1* mutant lines. (a-c)** Profiles of wild-type pennycress,  
350 pennycress *fae1* and *rod1* mutants. The amino acid sequences derived from  
351 Arabidopsis and wild-type pennycress compared to mutant pennycress alleles are  
352 shown to the right. The red letters highlight the amino acid substitutions. Fatty acid  
353 names along with carbon chain lengths and the degrees of desaturation are  
354 shown across the bottom.

355

### 356 **Stacking traits to develop domesticated pennycress**

357 This study has identified pennycress lines that harbor crucial  
358 domestication traits including early maturity, reduced shatter, reduced erucic acid  
359 and reduced PUFAs. Importantly, none of the described mutations reduced plant  
360 stature or predicted yield (**Table S1 and Fig. S3**). Knowledge of the causative  
361 mutations in each of the lines has been used to develop molecular probes that  
362 can follow each of the traits in segregating populations at the molecular level  
363 (**Table S3-4 and Data S1-3**). To begin to combine these traits, a cross was made  
364 between *Ta-fae1-1* and *Ta-rod1-1*. KASP markers were designed for the specific  
365 mutations in each of these mutants (see Materials and Methods). Using this  
366 approach (**Fig S4**) it was possible to identify the double mutants in an F<sub>2</sub>  
367 population at the seedling stage over two months before they began to produce  
368 seeds. The fatty acid composition of the oil from these double mutants was very  
369 high in oleic acid, low in erucic acid, with reduced levels of in PUFAs. Overall, the  
370 fatty acid profile of the double mutant pennycress oil closely resembled the  
371 profile of canola oil (**compare Figs. 5a and 5b**) (Dyer *et al.* 2008).

372 Mutation specific KASP markers have been used to identify additional  
373 double and triple mutant combinations in F<sub>1</sub> and F<sub>2</sub> individuals derived from  
374 various crosses between the pennycress mutants (**Table S5**). This includes a  
375 line that is homozygous for the combined *Ta-fae-1*, *Ta-rod-1*, and *Ta-aop2-1*  
376 mutations. This line produces seeds that are essentially equivalent to those from  
377 the so-called “double 0” canola that similarly lack erucic acid and contain low  
378 levels of glucosinolates (Bell 1982). Additional crosses have generated an F<sub>1</sub>

379 plant that is heterozygous for all five of the desirable traits described in this report  
380 (**Fig S5**). Progenies from this F<sub>1</sub> plant will be genotyped to identify a line  
381 homozygous for all five mutations. This stacked line will represent the first-  
382 generation domesticated pennycress variety and will be subjected to field-testing  
383 ahead of potential commercialization.  
384

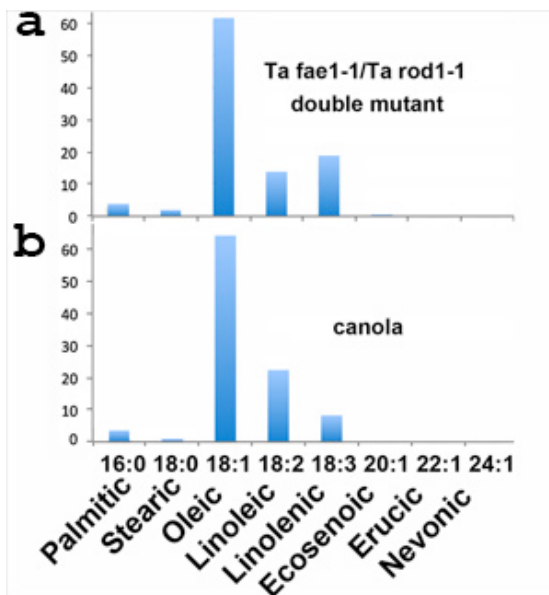

385  
386  
387

388 **Figure 5. Comparison of fatty acid profiles of pennycress fae1/rod1 double**  
389 **mutant compared to canola oil. (a) Double mutant, (b) canola.** Fatty acid  
390 names along with carbon chain lengths and the degrees of desaturation are  
391 shown across the bottom.

392  
393

## 394 Discussion

395  
396  
397  
398  
399  
400

The traits described in this report should allow domesticated pennycress to intensify farm output by utilizing land from fall to spring that is not currently in production. The early maturing pennycress described in this report will better fit into existing crop rotations. The reductions in pod shatter will greatly improve



401 harvestable yield, and the reductions in glucosinolates and improvements in oil  
402 quality will enhance the value of the oilseeds. The rapid progress in identifying  
403 these traits in pennycress was due to reduced gene redundancy, which facilitated  
404 the creation of pennycress mutants that closely resemble similar *Arabidopsis*  
405 mutants(Chopra, *et al.* 2018b, Sedbrook, *et al.* 2014).

406

407 The causative mutations responsible for the domestication traits described  
408 in this study have been well studied in *Arabidopsis*(Provar, *et al.* 2015). Knowing  
409 the causative nature of the mutations responsible for the pennycress  
410 domestication traits is important for several reasons. The information can be  
411 used to stimulate additional basic research on the molecular mechanisms that  
412 control these traits. This is especially true for the *Ta-AOP2* gene. The enzyme  
413 encoded by this gene catalyzes the last step in the glucosinolate pathway in  
414 pennycress. Through some unknown mechanism the mutation in this gene  
415 results in reduced metabolic flux through the pathway. The information also can  
416 be used to improve current crops or to help guide the domestication and creation  
417 of new crops. For example, *ELF6* now becomes good target for hastening  
418 maturation of related *B. napus* (canola). Likewise these results show that  
419 simultaneously reducing in both *ROD1* and *FAE1* activity can greatly increase  
420 oleic acid content above that found for either of the single mutants. This should  
421 have wide ranging applications in modifying the seed oil fatty acid content of  
422 many plants. Importantly, the causative mutations can be used as molecular  
423 markers as in the pipeline shown in **Fig. S4** to combine the pennycress traits into  
424 single lines. Using this pipeline, single plant lines harboring all the traits  
425 described in this report will be ready for field-testing within the next two years.

426 The traits described in this report were created using classical  
427 mutagenesis. Classical mutagenesis has long been used to induce useful  
428 mutations in crop plants (Ahloowalia *et al.* 2004, Oladosu *et al.* 2016). For this  
429 work we used EMS as a mutagen (Chopra, *et al.* 2018b). Treatments with EMS  
430 generate up to thousands of mutations in each mutagenized line creating a large  
431 pool of mutant genes in a relatively small population. This increases the odds of

432 finding mutants of interest as described in this study. As previously described,  
433 these pools mutations can be used to mine for additional desirable traits (Chopra,  
434 *et al.* 2018b). On the downside these lines may carry deleterious mutations.  
435 However, many of these can be identified from their known affects in Arabidopsis  
436 and can be removed by marker-assisted breeding(Chopra, *et al.* 2018b).

437 In theory, it would have been faster to use gene-editing approaches to  
438 create the domestication traits described in this report. In fact, we have created  
439 an alternative zero erucic acid pennycress line using CRISPR-Cas9 mediated  
440 gene editing (McGinn *et al.* 2018). However, successful utilization of gene editing  
441 requires precise knowledge about the genes one wishes to target. This  
442 knowledge is not always available. For example, *ELF6*, *ROD1* and *AOP2-like*  
443 were not on the original list of gene targets for improving pennycress(Sedbrook,  
444 *et al.* 2014). Furthermore, the creation of partial loss of function mutations, such  
445 as that responsible for the desirable *Ta-ind-1* allele, requires prior knowledge  
446 before gene editing can be employed. To balance speed and discovery, we will  
447 continue to utilize both classical breeding to stack desirable traits and gene  
448 editing to produce desirable mutations in existing elite pennycress breeding lines.

449 There are many obvious improvements that can be made to enhance the  
450 potential success of pennycress as a new crop. For example, the dark colored  
451 seed coats contain high levels of oxidized tannins, which can interfere with  
452 protein uptake in the intestinal tracts of animals that are fed pennycress seed  
453 meal(Butler 1992). In a previous report, pennycress mutants lacking tannins have  
454 been described, and this trait is currently being added to the stacked line(Chopra,  
455 *et al.* 2018b). Additional screens are underway to identify second-generation  
456 domestication traits such as reduced seed dormancy, increased yield, increased  
457 seed size, increased oil content and improved protein quality. Many of these  
458 traits will aid in crop establishment and improve upon current net-economic  
459 returns, which increase the likelihood that pennycress will be adopted (Ott *et al.*  
460 2019).

461 The identification and stacking of domestication traits represent the first  
462 step toward the creation a new crop. Concurrently with the ongoing work

463 described in this report, agronomists and ecologists are working to develop  
464 planting recommendations and to understand the effects of growing pennycress  
465 on the landscape. In addition, food scientists are beginning to study the potential  
466 of pennycress as a new food source for human consumption. For example, the  
467 “double zero” - like pennycress seeds lacking erucic acid with greatly reduced  
468 glucosinolate will be used for various analyses including feeding trials. The  
469 canola-like oil will also provide an important new feedstock for the development  
470 biofuels and bioproducts.

471 Newly domesticated pennycress has the potential to intensify farm output  
472 by being grown during the fallow period between existing summer crops.  
473 Importantly, pennycress grown during the fallow seasons has been shown to  
474 provide much needed ecosystem services including nitrogen uptake and the  
475 suppression of spring weeds, which will enhance the sustainability of current  
476 agricultural practices. We believe the combined oilseed production and  
477 ecosystem rewards will greatly outweigh the remaining challenges in developing  
478 pennycress as a new cash cover crop.

479

480

## 481 **Materials and Methods**

482

### 483 **Screening of mutant pennycress populations for important traits**

484

485 We previously described the creation of a large pennycress mutant populations  
486 using ethyl methane sulfonate (EMS) and other mutagens (Chopra, *et al.* 2018b).

487 These represent the test populations used to search for pennycress mutants  
488 similar to Arabidopsis mutants that exhibit agronomically desirable phenotypes.

489

### 490 **Seed Source, DNA isolation, Sanger Sequencing, Whole-Genome**

#### 491 **Sequencing**

492 The source of the pennycress seeds for development of genomic  
493 resources was previously described in Dorn et al. (Dorn, *et al.* 2015). Mutants  
494 characterized in this report were derived from EMS treated seeds as described in  
495 Chopra et al.(Chopra, *et al.* 2018b). DNA was isolated from the candidate  
496 mutants using a Qiagen plant genomic DNA kit (Qiagen, Valencia, CA). DNA was  
497 subjected to WGS using an Illumina HiSeq 2500 sequencer (2x125 bp). Raw  
498 reads were analyzed using the method described by Chopra et al.(Chopra, *et al.*  
499 2018b) to detect and predict the nature of mutations in each of these candidate  
500 mutants (Table **S3**). Gene-specific primers (Table **S6**) were designed to PCR  
501 amplify and sequence putative pennycress orthologs. PCR products were  
502 subjected to Sanger sequencing. DNA sequences were analyzed using the CLC  
503 Genomics Workbench (Qiagen, Valencia, CA) to process files, identify and  
504 confirm the corresponding mutations. Protein sequence alignments were  
505 performed using the sequences from *Thlaspi arvense* (Ta), and *Arabidopsis*  
506 *thaliana* (At) for the candidate genes. Mutation sites of the candidate genes were  
507 changed manually, and alignments were performed using the clustalW program.  
508 Genomic DNA sequences, protein sequences and alignments for all the wild-type  
509 and mutants genes discussed in this article are provided in the **Data S1, S2, and**  
510 **S3** files.

511

## 512 **Early flowering phenotyping**

513 F<sub>2</sub> plants from a cross between the wild-type GRIN accession Ames  
514 23761 and the early flowering mutant MN A7-25 were planted into Ray Leach  
515 SC10 Cone-tainers™ filled with Sun Gro Metro Mix 560 Sun-Coir. After  
516 germination, plants were allowed to grow to the two true leaf stage in a 20 °C  
517 growth chamber. Plants were then transferred to a growth chamber maintained at  
518 4 °C and 8 hours of light for a vernalization period of 21 days. After this period  
519 plants were returned to the 20 °C growth chamber. Days to flowering were  
520 recorded as the number of days after plants were returned to the 20 °C growth  
521 chamber to the first open florets visible on the plant.

522

## 523 **Genotyping using allele-specific markers**

524 To perform co-segregation analysis on F<sub>2</sub> progenies derived from *elf6*-  
525 1\*Ames23761 and *aop2-like-1*\*MN106 crosses, we designed allele-specific and  
526 flanking primers for each of the alleles (Table **S4**). DNA was extracted using the  
527 Sigma ready extract method and genotyping was performed using the methods  
528 described in Chopra et al. (Chopra, *et al.* 2018b).

529

## 530 **Expression analysis**

531 Leaf tissue from ten seedlings for each replicate were pooled from wild-  
532 type and the mutant (*elf6-1*) for RNA extractions. RNA was extracted using the  
533 RNAeasy mini clean up kit (Qiagen, Valencia, CA) and treated with turbo DNase  
534 (ThermoFisher Cat. No. AM2238). To evaluate the expression patterns in the  
535 wild type and mutants; qRT-PCR primers were designed for actin, tubulin, *ELF6*  
536 and *FLC* genes (Table **S7**). Briefly, cDNA libraries were synthesized using  
537 Invitrogen cDNA synthesis kit (Invitrogen, Grand Island, NY) and PCR was  
538 performed using SybrGreen (Roche Cat. No. 04 707 516 001) on a LightCycler  
539 480 (Roche, Basel Switzerland). Average C<sub>t</sub> values generated from three  
540 replicates for each of the cDNA libraries were used to normalize and calculate  
541 the fold change in expression of genes, respectively.

542

### 543 **Reduced pod shatter phenotyping**

544           The force required to break apart seedpods at the septum was determined  
545 using a gram force tension gauge (SSEYL ATG-100-2 Tension Gauge) attached  
546 to a two-inch alligator clip (Gardner Bender, Milwaukee, WI). Briefly, one side of  
547 a pod was clipped and then the other side was manually pulled until either the  
548 pod broke at the septum or the fin tore. Pods that broke on handling before being  
549 clipped were recorded as zero. For each line, ten pods each from five different  
550 plants were used for the measurements.

551 Samples for observations of separation layers were prepared by either free-hand  
552 or microtome sectioning. The free-hand sections were cut with a razor blade,  
553 briefly stained with 0.05% toluidine blue O, and then transferred to a microscope  
554 slide for observation using Nikon SMZ1500 stereo microscope. Samples used for  
555 microtome sectioning were fixed for 5 h in 2% glutaraldehyde buffered with  
556 0.025M phosphate buffer, pH7, and post-fixed 1–2 h in 2% OsO<sub>4</sub>. Specimens  
557 were dehydrated in a graded series of acetone, infiltrated in Spurr's resin, and  
558 polymerized in a 70° C oven. Semi-thin sections 1 μm thick were made with a  
559 Leica UCT Ultracut Microtome, stained with 0.1% toluidine blue, and viewed with  
560 a Leica DMRBE compound microscope using the 20x objective.

561

### 562 **Glucosinolates in leaf tissue and seeds using UV absorbance method**

563           To determine glucosinolate content in the pennycress leaf tissues and  
564 pennycress seeds, we recorded the fresh tissue weights or seed weights of the  
565 samples. Briefly, glucosinolates were extracted in 80% methanol followed by  
566 purification and were quantified using the method described by Chopra et al.  
567 (Chopra, *et al.* 2018a) . At least three biological replicates were used for  
568 estimating the glucosinolate content in each of the segregating progeny.

569

### 570 **HPLC analysis of wild-type and Nutty seeds**

571           Glucosinolates in the seeds of the wild-type and mutant samples were  
572 extracted and analyzed with HPLC using the method described by Kliebenstein  
573 et al. (Kliebenstein, *et al.* 2001). Briefly, forty microliters of the glucosinolate

574 extract was run on a 5-mm column (Lichrocart 250–4 RP18e, Hewlett-Packard,  
575 Waldbronn, Germany) on a Hewlett-Packard 1100 series HPLC. Compounds  
576 were detected at 229 nm and separated utilizing the programs described by  
577 Kliebenstein et al.(Kliebenstein, *et al.* 2001) with aqueous acetonitrile.

578

### 579 **Fatty acid composition analysis using Gas Chromatography**

580       Approximately 100 mg of seeds from the wild-type and mutants of interest  
581 from NIRS scans were weighed and crushed with 1,000 µl of hexane containing  
582 a C17:0 internal standard using a mechanical homogenizer for three min at 10  
583 m/s. The hexane supernatant containing the extracted oil was then transferred to  
584 glass vials for methylation and FAMES were separated and detected using the  
585 methods described in Chopra et al (Chopra, *et al.* 2018a). At least two replicates  
586 were used for estimating the fatty acid composition in each of the lines.

587

588

## 589 **Acknowledgments**

590

591 **General:** We acknowledge the hard work of many undergraduates and others who  
592 contributed to this study including: Karl Nord, Carl Branch, Liam Sullivan, Luke Aldrich,  
593 Greta Rockstad and many others. We thank Martha Cook and Tara Nazarenius for help  
594 with tissue embedding / sectioning / microscopy and seed oil analyses, respectively.

595

596 **Funding:** This material is based upon work that is supported by the National Institute of  
597 Food and Agriculture, U.S. Department of Agriculture, under award numbers 2014-  
598 67009-22305 and 2018-67009-27374 to M.D.M, J.C.S and W.B.P. Funding for research  
599 conducted in the E.B.C lab was provided by U.S. Department of Energy, Office of  
600 Science, OBER (DOE-BER SC0012459) and NSF Plant Genome Program (13-39385).  
601 Additional funds were provided by the Minnesota Department of Agriculture and the  
602 University of Minnesota Forever Green Initiative to J.A.A. and B.I., and the Walton  
603 Family Foundation, PepsiCo and General Mills to D.L.W.

604

605 **Author Contributions** M.D.M. and J.C.S. conceived the study, designed experiments,  
606 supervised and organized coworkers, created mutagenized populations, isolated  
607 mutants, helped characterize the mutants, identified candidate genes, and co-wrote the  
608 manuscript. R.C. along with E.B.C, C.G. and B.I. characterized the fatty acid profiles,  
609 along with K.M.D. performed WGS analyses, and also independently performed  
610 extensive data analyses and helped write the first draft of the manuscript. J.L. D.J.K, and  
611 T.U. were responsible for the wet lab glucosinolate analyses. E.D., N.F, R.E, M.E., M.M.,  
612 A.B. and K.A. isolated mutants and helped characterize candidate genes. M.O. helped  
613 evaluate *FLC* expression and seed yield of the *elf6* mutant. J.A.A. and K.A. help with the  
614 initial NIR set-up. K.M.D, K.F. and R.C. helped characterize the *elf6* mutant. A.B.  
615 generated and imaged wild-type and *ind-3* seedpod sections. D.L.W. isolated wild-type  
616 line MN106 used in the study and aided in planning.

617

618 **Competing Interests:** The authors declare potential competing financial interests as  
619 intellectual property applications have been submitted on portions of the reported  
620 research.

621



622 **Data and materials availability:** All sequence information described in this study is  
623 contained within the Supplementary Materials. All plant materials described in this report  
624 are available upon completion of Material Transfer Agreements.

625

626

Literature Cited

- 627  
628  
629  
630 (2014) *Yield Gains in Major U.S. Field Crops* Madison, WI: American Society of Agronomy, Inc., Crop  
631 Science Society of America, Inc., and Soil Science Society of America, Inc.
- 632 **Abbo, S., Pinhasi van-Oss, R., Gopher, A., Saranga, Y., Ofner, I. and Peleg, Z.** (2014) Plant  
633 domestication versus crop evolution: a conceptual framework for cereals and grain legumes.  
634 *Trends Plant Sci*, **19**, 351-360.
- 635 **Ahloowalia, B.S., Maluszynski, M. and Nichterlein, K.** (2004) Global impact of mutation-derived  
636 varieties. *Euphytica*, **135**, 187-204.
- 637 **Anderson, T.R., Hawkins, E. and Jones, P.D.** (2016) CO<sub>2</sub>, the greenhouse effect and global warming:  
638 from the pioneering work of Arrhenius and Callendar to today's Earth System Models. *Endeavour*,  
639 **40**, 178-187.
- 640 **Bell, J.** (1982) From rapeseed to canola: A brief history of research for superior meal and edible oil.  
641 *Poultry Sci*, **61**, 613-622.
- 642 **Butler, L.G.** (1992) Antinutritional Effects of Condensed and Hydrolyzable Tannins. In *Plant*  
643 *Polyphenols: Synthesis, Properties, Significance* (Hemingway, R.W. and Laks, P.E. eds). Boston,  
644 MA: Springer US, pp. 693-698.
- 645 **Chopra, R., Folstad, N., Lyons, J., Ulmasov, T., Gallaher, C., Sullivan, L., McGovern, A., Mitacek, R.,**  
646 **Frels, K., Altendorf, K., Killiam, A., Ismail, B., Anderson, J.A., Wyse, D.L. and Marks, M.D.**  
647 (2018a) The Adaptable Use of Brassica NIRS Calibration Equations to Identify Pennycress  
648 Variants to Facilitate the Rapid Domestication of a New Winter Oilseed Crop. *in press*.
- 649 **Chopra, R., Johnson, E.B., Daniels, E., McGinn, M., Dorn, K.M., Esfahanian, M., Folstad, N.,**  
650 **Amundson, K., Altendorf, K., Betts, K., Frels, K., Anderson, J.A., Wyse, D.L., Sedbrook, J.C.**  
651 **and Marks, M.D.** (2018b) Translational genomics using Arabidopsis as a model enables the  
652 characterization of pennycress genes through forward and reverse genetics. *The Plant Journal*, **96**,  
653 1093-1105.
- 654 **Claver, A., Rey, R., López, M.V., Picorel, R. and Alfonso, M.** (2017) Identification of target genes and  
655 processes involved in erucic acid accumulation during seed development in the biodiesel feedstock  
656 Pennycress (*Thlaspi arvense* L.). *J Plant Physiol*, **208**, 7-16.
- 657 **Crevillán, P., Yang, H., Cui, X., Greeff, C., Trick, M., Qiu, Q., Cao, X. and Dean, C.** (2014)  
658 Epigenetic reprogramming that prevents transgenerational inheritance of the vernalized state.  
659 *Nature*, **515**, 587.
- 660 **De Bruin, J.L. and Pedersen, P.** (2008) Soybean Seed Yield Response to Planting Date and Seeding Rate  
661 in the Upper Midwest All rights reserved. No part of this periodical may be reproduced or  
662 transmitted in any form or by any means, electronic or mechanical, including photocopying,  
663 recording, or any information storage and retrieval system, without permission in writing from the  
664 publisher. *Agron J*, **100**, 696-703.
- 665 **DeHaan, L.R., Van Tassel, D.L., Anderson, J.A., Asselin, S.R., Barnes, R., Baute, G.J., Cattani, D.J.,**  
666 **Culman, S.W., Dorn, K.M. and Hulke, B.S.** (2016) A pipeline strategy for grain crop  
667 domestication. *Crop Sci*, **56**, 917-930.
- 668 **Dorn, K.M., Fankhauser, J.D., Wyse, D.L. and Marks, M.D.** (2013) De novo assembly of the  
669 pennycress (*Thlaspi arvense*) transcriptome provides tools for the development of a winter cover  
670 crop and biodiesel feedstock. *Plant Journal*, **75**, 1028-1038.
- 671 **Dorn, K.M., Fankhauser, J.D., Wyse, D.L. and Marks, M.D.** (2015) A draft genome of field pennycress  
672 (*Thlaspi arvense*) provides tools for the domestication of a new winter biofuel crop. *DNA*  
673 *Research*, **22**, 121-131.
- 674 **Dorn, K.M., Johnson, E.B., Daniels, E., Wyse, D. and Marks, M.D.** (2017) Spring flowering habit in  
675 field pennycress (*Thlaspi arvense*) has arisen multiple independent times. *Plant Direct*, **2**, e00097.
- 676 **Dunn, M., Ulrich-Schad, J.D., Prokopy, L.S., Myers, R.L., Watts, C.R. and Scanlon, K.** (2016)  
677 Perceptions and use of cover crops among early adopters: Findings from a national survey.  
678 *Journal of Soil and Water Conservation*, **71**, 29-40.
- 679 **Dyer, J.M., Stymne, S., Green, A.G. and Carlsson, A.S.** (2008) High-value oils from plants. *The Plant*  
680 *Journal*, **54**, 640-655.
- 681 **Fan, J., Shonnard, D.R., Kalnes, T.N., Johnsen, P.B. and Rao, S.** (2013) A life cycle assessment of  
682 pennycress (*Thlaspi arvense* L.)-derived jet fuel and diesel. *Biomass and Bioenergy*, **55**, 87-100.

- 683 Gerland, P., Raftery, A.E., Ševčíková, H., Li, N., Gu, D., Spoorenberg, T., Alkema, L., Fosdick, B.K.,  
684 Chunn, J., Lalic, N., Bay, G., Buettner, T., Heilig, G.K. and Wilmoth, J. (2014) World  
685 population stabilization unlikely this century. *Science*, **346**, 234-237.
- 686 Gordon, M.H. (2001) The development of oxidative rancidity in foods. In *Antioxidants in food*: Elsevier,  
687 pp. 7-21.
- 688 Hart, G.E. (2015) Feeding the ethanol boom: Where will the corn come from. *Iowa Ag Review*, **12**.
- 689 Harvey, M. and Pilgrim, S. (2011) The new competition for land: Food, energy, and climate change. *Food*  
690 *Policy*, **36**, S40-S51.
- 691 Heap, I. (2014) Herbicide Resistant Weeds. In *Integrated Pest Management: Pesticide Problems, Vol.3*  
692 (Pimentel, D. and Peshin, R. eds). Dordrecht: Springer Netherlands, pp. 281-301.
- 693 Ho, D.P., Ngo, H.H. and Guo, W. (2014) A mini review on renewable sources for biofuel. *Bioresource*  
694 *Technology*, **169**, 742-749.
- 695 Isbell, T.A. (2009) US effort in the development of new crops (Lesquerella, Pennycress Coriander and  
696 Cuphea). *Oléagineux, Corps gras, Lipides*, **16**, 205-210.
- 697 James, D.W., Jr., Lim, E., Keller, J., Plooy, I., Ralston, E. and Dooner, H.K. (1995) Directed tagging of  
698 the Arabidopsis FATTY ACID ELONGATION1 (FAE1) gene with the maize transposon  
699 activator. *Plant Cell*, **7**, 309-319.
- 700 Jeong, J.H., Song, H.R., Ko, J.H., Jeong, Y.M., Kwon, Y.E., Seol, J.H., Amasino, R.M., Noh, B. and  
701 Noh, Y.S. (2009) Repression of FLOWERING LOCUS T chromatin by functionally redundant  
702 histone H3 lysine 4 demethylases in Arabidopsis. *PLoS One*, **4**, e8033.
- 703 Johnson, G.A., Kantar, K.B., Betts, K.J. and Wyse, D.L. (2015) Field Pennycress Production and Weed  
704 Control in a Double Crop System with Soybean in Minnesota. *Agron J*, **107**, 532-540.
- 705 Johnson, G.A., Wells, M.S., Anderson, K., Gesch, R.W., Forcella, F. and Wyse, D.L. (2017) Yield  
706 Tradeoffs and Nitrogen between Pennycress, Camelina, and Soybean in Relay- and Double-Crop  
707 Systems. *Agron J*, **109**, 2128-2135.
- 708 Jordan, N., Boody, G., Broussard, W., Glover, J.D., Keeney, D., McCown, B.H., McIsaac, G., Muller,  
709 M., Murray, H., Neal, J., Pansing, C., Turner, R.E., Warner, K. and Wyse, D. (2007)  
710 Environment - Sustainable development of the agricultural bio-economy. *Science*, **316**, 1570-1571.
- 711 Kliebenstein, D.J., Lambrix Vm Fau - Reichelt, M., Reichelt M Fau - Gershenzon, J., Gershenzon J  
712 Fau - Mitchell-Olds, T. and Mitchell-Olds, T. (2001) Gene duplication in the diversification of  
713 secondary metabolism: tandem 2-oxoglutarate-dependent dioxygenases control glucosinolate  
714 biosynthesis in Arabidopsis. *Plant Cell*, **13** (3), 681-693.
- 715 Knutsen, H.K., Alexander, J., Barregaard, L., Bignami, M., Brüschweiler, B., Ceccatelli, S., Dinovi,  
716 M., Edler, L., Grasl - Kraupp, B. and Hogstrand, C. (2016) Erucic acid in feed and food.  
717 *EFSA Journal*, **14**, 1-173.
- 718 Liljegren, S.J., Roeder, A.H., Kempin, S.A., Gremski, K., Ostergaard, L., Guimil, S., Reyes, D.K. and  
719 Yanofsky, M.F. (2004) Control of fruit patterning in Arabidopsis by INDEHISCENT. *Cell*, **116**,  
720 843-853.
- 721 Lu, C., Xin, Z., Ren, Z., Miquel, M. and Browse, J. (2009) An enzyme regulating triacylglycerol  
722 composition is encoded by the ROD1 gene of Arabidopsis. *Proc Natl Acad Sci U S A*, **106**, 18837-  
723 18842.
- 724 Lu, F., Li, G., Cui, X., Liu, C., Wang, X.-J. and Cao, X. (2008) Comparative Analysis of JmjC Domain-  
725 containing Proteins Reveals the Potential Histone Demethylases in Arabidopsis and Rice. *J Integr*  
726 *Plant Biol*, **50**, 886-896.
- 727 McGinn, M., Phippen, W.B., Chopra, R., Bansal, S., Jarvis, B.A., Phippen, M.E., Dorn, K.M.,  
728 Esfahanian, M., Nazarenus, T.J., Cahoon, E.B., Durrett, T.P., Marks, M.D. and Sedbrook,  
729 J.C. (2018) Molecular tools enabling pennycress (*Thlaspi arvense*) as a model plant and oilseed  
730 cash cover crop. *Plant Biotechnol J*, **0**.
- 731 Moser, B.R. (2012) Biodiesel from alternative oilseed feedstocks: camelina and field pennycress. *Biofuels*,  
732 **3**, 193-209.
- 733 Moser, B.R., Knothe, G., Vaughn, S.F. and Isbell, T.A. (2009a) Production and Evaluation of Biodiesel  
734 from Field Pennycress (*Thlaspi arvense* L.) Oil. *Energ Fuel*, **23**, 4149-4155.
- 735 Moser, B.R., Shah, S.N., Winkler-Moser, J.K., Vaughn, S.F. and Evangelista, R.L. (2009b)  
736 Composition and physical properties of cress (*Lepidium sativum* L.) and field pennycress (*Thlaspi*  
737 *arvense* L.) oils. *Ind Crop Prod*, **30**, 199-205.

- 738 **Noh, B., Lee, S.H., Kim, H.J., Yi, G., Shin, E.A., Lee, M., Jung, K.J., Doyle, M.R., Amasino, R.M. and**  
739 **Noh, Y.S.** (2004) Divergent roles of a pair of homologous jumonji/zinc-finger-class transcription  
740 factor proteins in the regulation of Arabidopsis flowering time. *Plant Cell*, **16**, 2601-2613.
- 741 **Oladosu, Y., Rafii, M.Y., Abdullah, N., Hussin, G., Ramli, A., Rahim, H.A., Miah, G. and Usman, M.**  
742 (2016) Principle and application of plant mutagenesis in crop improvement: a review.  
743 *Biotechnology & Biotechnological Equipment*, **30**, 1-16.
- 744 **Ott, M.A., Eberle, C.D., Thom, M.D., Archer, D.W., Forcella, F., Gesch, R.W. and Wyse, D.L.** (2019)  
745 Economics and agronomics of dual-cropping pennycress and camelina with soybean in Minnesota.  
746 *Agron J*, in press.
- 747 **Perng, W., Villamor, E., Mora-Plazas, M., Marin, C. and Baylin, A.** (2014) Alpha-linolenic acid (ALA)  
748 is inversely related to development of adiposity in school-age children. *European Journal Of*  
749 *Clinical Nutrition*, **69**, 167.
- 750 **Phippen, W.B. and Phippen, M.E.** (2012) Soybean Seed Yield and Quality as a Response to Field  
751 Pennycress Residue. *Crop Sci*, **52**, 2767-2773.
- 752 **Price, A.J., Balkcom, K.S., Culpepper, S.A., Kelton, J.A., Nichols, R.L. and Schomberg, H.** (2011)  
753 Glyphosate-resistant Palmer amaranth: A threat to conservation tillage. *Journal of Soil and Water*  
754 *Conservation*, **66**, 265-275.
- 755 **Provart, N.J., Alonso, J., Assmann, S.M., Bergmann, D., Brady, S.M., Brkljacic, J., Browse, J.,**  
756 **Chapple, C., Colot, V., Cutler, S., Dangl, J., Ehrhardt, D., Friesner, J.D., Frommer, W.B.,**  
757 **Grotewold, E., Meyerowitz, E., Nemhauser, J., Nordborg, M., Pikaard, C., Shanklin, J.,**  
758 **Somerville, C., Stitt, M., Torii, K.U., Waese, J., Wagner, D. and McCourt, P.** (2015) 50 years  
759 of Arabidopsis research: highlights and future directions. *New Phytol.*, **209**, 921-944.
- 760 **Rajaram, S.** (2014) Health benefits of plant-derived  $\hat{\pm}$ -linolenic acid. *Am J Clin Nutr*, **100**, 443S-448S.
- 761 **Robertson, G.P. and Vitousek, P.M.** (2009) Nitrogen in Agriculture: Balancing the Cost of an Essential  
762 Resource. *Annual Review of Environment and Resources*, **34**, 97-125.
- 763 **Roesch-McNally, G.E., Basche, A.D., Arbuckle, J.G., Tyndall, J.C., Miguez, F.E., Bowman, T. and**  
764 **Clay, R.** (2017) The trouble with cover crops: Farmers' experiences with overcoming barriers to  
765 adoption. *Renew Agr Food Syst*, **33**, 322-333.
- 766 **Sedbrook, J.C., Phippen, W.B. and Marks, M.D.** (2014) New approaches to facilitate rapid  
767 domestication of a wild plant to an oilseed crop: example pennycress (*Thlaspi arvense* L.). *Plant*  
768 *Sci*, **227**, 122-132.
- 769 **Sonderby, I.E., Geu-Flores, F. and Halkier, B.A.** (2010) Biosynthesis of glucosinolates--gene discovery  
770 and beyond. *Trends Plant Sci*, **15**, 283-290.
- 771 **Tester, M. and Langridge, P.** (2010) Breeding Technologies to Increase Crop Production in a Changing  
772 World. *Science*, **327**, 818.
- 773 **Tilman, D., Balzer, C., Hill, J. and Befort, B.L.** (2011) Global food demand and the sustainable  
774 intensification of agriculture. *Proceedings of the National Academy of Sciences*, **108**, 20260.
- 775 **Warwick, S.I., Francis, A. and Susko, D.J.** (2002) The biology of Canadian weeds. 9. *Thlaspi arvense* L.  
776 (updated). *Can J Plant Sci*, **82**, 803-823.
- 777 **Weyers, S., Thom, M.D., Forcella, F., Eberle, C.A., Matthees, H., Gesch, R., Ott, M.A., Feyereisen, G.,**  
778 **Strock, J.S. and Wyse, D.** (201) Reduced-nutrient leachates in cash cover crop-soybean systems.  
779 *J Environ Qual*, in press.
- 780 **Wittkop, B., Snowdon, R.J. and Friedt, W.** (2009) Status and perspectives of breeding for enhanced yield  
781 and quality of oilseed crops for Europe. *Euphytica*, **170**, 131.
- 782 **Wortmann, C.S., Tarkalson, D.D., Shapiro, C.A., Dobermann, A.R., Ferguson, R.B., Hergert, G.W.**  
783 **and Walters, D.** (2011) Nitrogen Use Efficiency of Irrigated Corn for Three Cropping Systems in  
784 Nebraska. *Agron J*, **103**, 76-84.
- 785  
786

787

## 788 **Supplementary Materials**

789

### 790 **List**

791 **Figure S1.** Comparisons of the separation layer of wild-type Spring 32 (left) and  
792 *ind-3* (right) seedpod sections stained with toluidine blue.

793 **Figure S2.** Average glucosinolate content of the progenies from the segregating  
794 population of *Ta-aop2-1* plants.

795 **Figure S3.** Comparisons of a wild-type pennycress plant with the “Nutty” *aop2-1*  
796 and “canola-like-oil” *fae1-1 rod1-1* mutants grown in controlled chambers.

797 **Figure S4.** A schematic representation of pennycress life-cycle from seeds to a  
798 mature plant.

799 **Figure S5.** F1 plant carrying all of the described mutations in this report and was  
800 selected using the allele-specific primers and strategy described in Fig S4.

801 **Table S1.** Plant height and seed yield comparisons between wild-type and early  
802 flowering mutant (*elf6-1*) grown in 1 x 1 m plots in the field.

803 **Table S2.** Protein domain analysis to highlight the conserved region in the  
804 Indehiscent gene (IND) using several databases.

805 **Table S3.** Summary of the mutations in the domestication related genes  
806 characterized in this study.

807 **Table S4.** Allele-specific primers designed for single nucleotide mutations in the  
808 domestication candidate genes.

809 **Table S5.** Summary of double and triple mutants generated using the approach  
810 described in Fig S4.

811 **Table S6.** Primers used for Sanger sequencing.

812 **Table S7.** Primers used for expression analysis of the *Ta-elf6-1* early flowering  
813 mutant.

814 **Data S1.** Genomic DNA Sequences of the candidate genes for pennycress  
815 domestication obtained from Thlaspi (pennycress) version 1.0 gene annotations  
816 and information on the mutation sites.

817 **Data S2.** Predicted protein sequences of the candidate genes for pennycress  
818 domestication obtained from *Thlaspi* version 1.0 gene annotations and mutation  
819 and information on the mutation sites.

820 **Data S3.** Protein sequence alignments of *Thlaspi arvense* (pennycress) wild-type  
821 sequences with the corresponding mutant and orthologous *Arabidopsis*  
822 sequences.

823

824

825

826

827

828

829

830

831

832

833

834

835  
836  
837  
838  
839  
840  
841  
842  
843  
844  
845  
846  
847  
848  
849  
850  
851  
852  
853  
854

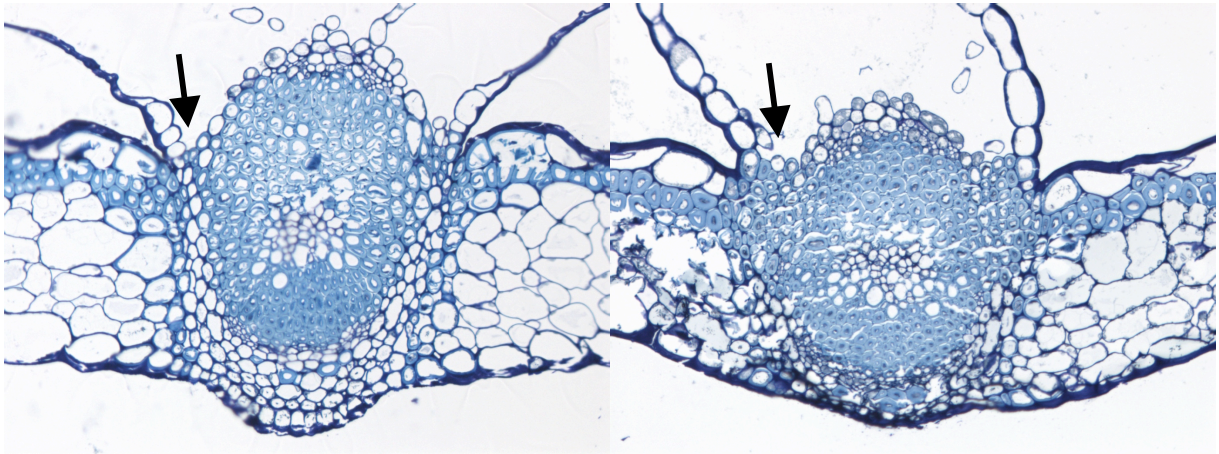

**Figure S1.** Comparisons of the separation layer of wild-type Spring 32 (left) and *ind-3* (right) seedpod sections stained with toluidine blue. Note the lack of a clear separation layer in *ind-3* (arrows).

855

856

857

858

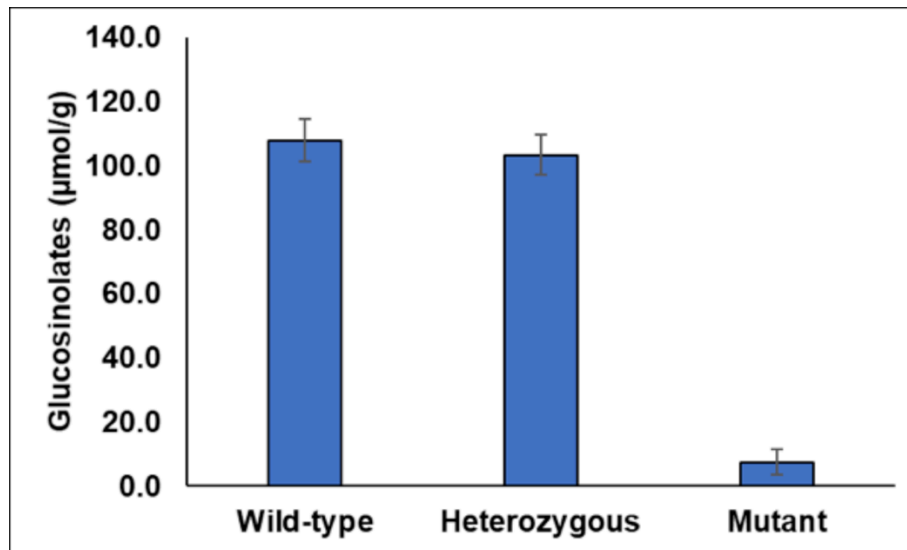

859

860 **Figure S2:** Average glucosinolate content of the progenies from the segregating  
861 population of *Ta-aop2-1* plants. Allele-specific markers were used to assess the *aop2-1*  
862 genotype of members in the population and glucosinolate content was analyzed using  
863 NIRS and confirmed with wet-lab assay.



864

865

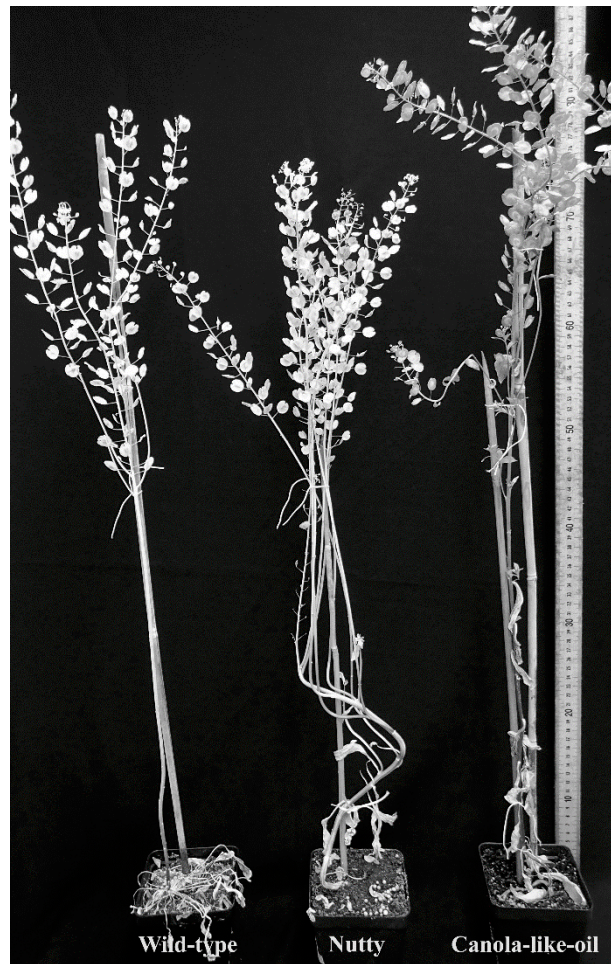

866

867

868 **Figure S3.** Comparisons of a wild-type pennycress plant with the “Nutty” *aop2-1*

869 and “canola-like-oil” *fae1-1 rod1-1* mutants grown in controlled chambers. No

870 developmental defects were observed to be associated with the respective traits.

871

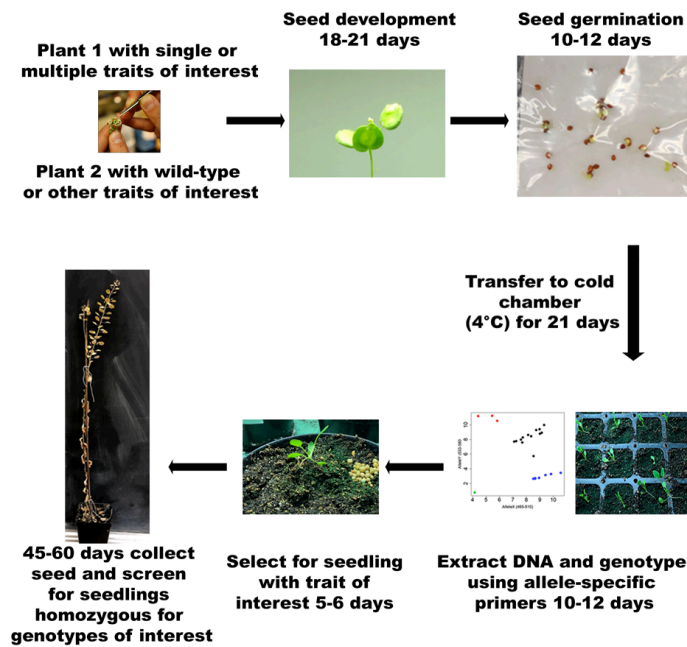

872

873 **Figure S4.** A schematic representation of pennycress life-cycle from seeds to a

874 mature plant. Seeds can be developed from the crossing event in 12-15 days.

875 Seeds can be propagated from seeds to mature in 75-80 days. This scheme of

876 propagating pennycress from would allow for minimum of three generations per

877 year.

878

879

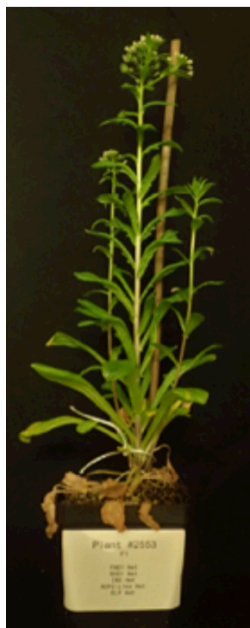

880

881 **Figure S5.** F<sub>1</sub> plant carrying all of the described mutations in this report and was  
882 selected using the allele-specific primers and strategy described in Fig S4.

883

884

885 **Table S1:** Plant height and seed yield comparisons between wild-type and early

886 flowering mutant (*elf6-1*) grown in 1 x 1 m plots in the field. No statistically

887 significant differences were observed among these lines ( $\pm$  sd).

888

| Line          | Plant height (cm)   | Seed yield (g)       |
|---------------|---------------------|----------------------|
| Wild-type     | 65 ( $\pm$ 0.25)    | 46.56 ( $\pm$ 11.48) |
| <i>elf6-1</i> | 67.58 ( $\pm$ 0.76) | 57.61 ( $\pm$ 14.15) |

889

890

891 **Table S2.** Protein domain analysis to highlight the conserved region in the  
892 Indehiscent gene (IND) using several databases.  
893

| Gene        | Database        | Family number     | Start Pos. | End Pos. | Gene Family                                     |
|-------------|-----------------|-------------------|------------|----------|-------------------------------------------------|
| Ta1.0_25465 | SMART           | SM00353           | 98         | 147      | Myc-type, basic helix-loop-helix (bHLH) domain  |
| Ta1.0_25465 | Gene3D          | G3DSA:4.10.280.10 | 84         | 154      | Helix-loop-helix DNA-binding domain superfamily |
| Ta1.0_25465 | ProSiteProfiles | PS50888           | 92         | 141      | Myc-type, basic helix-loop-helix (bHLH) domain  |
| Ta1.0_25465 | SUPERFAMILY     | SSF47459          | 97         | 151      | Helix-loop-helix DNA-binding domain superfamily |
| Ta1.0_25465 | CDD             | cd00083           | 96         | 146      | Myc-type, basic helix-loop-helix (bHLH) domain  |
| Ta1.0_25465 | Pfam            | PF00010           | 100        | 141      | Myc-type, basic helix-loop-helix (bHLH) domain  |

894  
895

896 **Table S3.** Summary of the mutations in the domestication related genes  
 897 characterized in this study.  
 898  
 899  
 900

| Scaffold Number  | Gene                                                | # of Alleles | Mutation                                                                                                                                                                     |
|------------------|-----------------------------------------------------|--------------|------------------------------------------------------------------------------------------------------------------------------------------------------------------------------|
| Ta_scaffold_10   | <i>ELF6</i><br>Early Flowering6                     | 1            | <b>Mutant:</b> A7 25<br><b>Genomic pos:</b> 107096<br><b>cDNA pos:</b> C952T<br><b>AA pos:</b> His318Tyr                                                                     |
| Ta_scaffold_1003 | <i>IND</i><br>Indehiscent                           | 3            | <b>Mutants:</b> E5 552; E5 550; Spring 32 NS<br><b>Genomic pos:</b> 6741, 6754, 6795<br><b>cDNA pos:</b> C247T; G260A; G301A<br><b>AA pos:</b> Pro83Ser; Arg87His; Ala101Thr |
| Ta_scaffold_74   | <i>AOP2</i><br>Alkenyl- and Hydroxyalkyl-Producing2 | 1            | <b>Mutant:</b> E3196<br><b>Genomic pos:</b> 395125<br><b>cDNA pos:</b> G289A<br><b>AA pos:</b> Gly97Arg                                                                      |
| Ta_scaffold_45   | <i>FAE1</i><br>Fatty Acid Elongation1               | 2            | <b>Mutants:</b> V296; K1822<br><b>Genomic pos:</b> 254962;<br><b>cDNA pos:</b> C1018T; G1349A<br><b>AA pos:</b> Gln340Stop; Trp450Stop                                       |
| Ta_scaffold_199  | <i>ROD1</i><br>Reduced Oleate Desaturation1         | 2            | <b>Mutants:</b> d0422; E5 370 P6<br><b>Genomic pos:</b> 186474; 186409<br><b>cDNA pos:</b> G678A; G743A<br><b>AA pos:</b> Met226Ile; Arg248Lys                               |

901 **Table S4.** Allele-specific primers designed for single nucleotide mutations in the  
 902 domestication candidate genes.

903

| Trait                                      | Primer Name | Sequence                 |
|--------------------------------------------|-------------|--------------------------|
| <b>Early Flowering</b>                     | elf6-1_C    | ATCCCTGGTGTGACATCTCC     |
|                                            | elf6-1_X    | AAGTCATGGTCCTCAACGTG     |
|                                            | elf6-1_Y    | AAGTCATGGTCCTCAACGTA     |
| <b>Reduced Shatter</b>                     | ind-1_C     | TCGTCGCTTACCCTTACGTT     |
|                                            | ind-1_X     | CGATCCAGCCACCGTTC        |
|                                            | ind-1_Y     | CGATCCAGCCACCGTTT        |
|                                            | ind-2_C     | TCTGAGTGTGTCGTCGTTACC    |
|                                            | ind-2_X     | CCGTTCCCTAAACCGAACCG     |
|                                            | ind-2_Y     | CCGTTCCCTAAACCGAACCA     |
|                                            | ind-3_C     | CTGGCACCATCCTCTTCAAT     |
|                                            | ind-3_X     | GACACTCAGACGGTGGTGG      |
|                                            | ind-3_Y     | GACACTCAGACGGTGGTGA      |
| <b>Reduced Glucosinolates</b>              | aop2_C      | CGTCAATGATCAGGACGTA      |
|                                            | aop2_X      | CGGTCTTTCCGAGAGTATGG     |
|                                            | aop2_Y      | AACGGTCTTTCCGAGAGTATGA   |
| <b>Reduced Erucic Acid</b>                 | fae1-1_C    | TAAAACCGGGGTGTGTTTGT     |
|                                            | fae1-1_X    | ACCCAATGTTGTTATGTTTTCTG  |
|                                            | fae1-1_Y    | GACCCAATGTTGTTATGTTTTCTA |
|                                            | fae1-2_C    | AAACCCTGACCCTAAAGCAA     |
|                                            | fae1-2_X    | ATGAAGAGAGGGAACAAAGTGTG  |
|                                            | fae1-2_Y    | GATGAAGAGAGGGAACAAAGTGA  |
| <b>Reduced polyunsaturated fatty acids</b> | rod1-1_C    | GGTTCGATGATCGCATCTTT     |
|                                            | rod1-1_X    | CTCATCCTCTGCATTCTCCTC    |
|                                            | rod1-1_Y    | TCTCATCCTCTGCATTCTCCTT   |
|                                            | rod1-2_C    | GCGATGCTTTTTGACATCCT     |
|                                            | rod1-2_X    | CTCGTCCCGAGCAGCC         |
|                                            | rod1-3_Y    | CTCGTCCCGAGCAGCT         |

904

905

906

907 **Table S5:** Summary of double and triple mutants generated using the approach  
908 described in Fig S4.  
909

| <b>Combination of alleles</b> |
|-------------------------------|
| fae1-1/rod1-1                 |
| fae1-1/elf6-1                 |
| fae1-1/aop2-like-1            |
| fae1-1/ind1-1                 |
| rod1-1/aop2-like-1            |
| elf6-1/ind1-1                 |
| aop2-like-1/ind1-1            |
| fae1-1/rod1-1/aop2-like-1     |
| fae1-1/rod1-1/ind1-1          |

910  
911



912 **Table S6.** Primers used for Sanger sequencing.

913

| Trait                  | Gene          | Forward Primer        | Reverse Primer           |
|------------------------|---------------|-----------------------|--------------------------|
| Early Flowering        | <i>ELF6</i>   | CGTCCAAGCAGAAGAACATGG | CCAGTTGATCAATGTTTCTGC    |
| Reduced Shatter        | <i>IND1</i>   | TGAAGGAGATGCAGTACACG  | TATAACGGATGGCTTCGTCG     |
| Reduced Glucosinolates | <i>AOP2</i>   | TCGGAGGAGCTTAAGAAGTC  | ACCTGATGCTCTTGTTACCG     |
| Reduced Erucic Acid    | <i>FAE1-1</i> | GACCTAAGTTCTTCTGTAGC  | TAAAACCGGGGTGTGTTTGT     |
| Reduced Erucic Acid    | <i>FAE1-2</i> | GAGAAAACATCGTAGCCATC  | AAACCCTGACCCTAAAGCAA     |
| Reduced PUFAs          | <i>ROD1</i>   | CATGTGGGGTTTGGGTTAAC  | GTTCAAGTAATTAACAGTATATTC |

914

915

916 **Table S7.** Primers used for expression analysis of the *Ta-elf6-1* early flowering  
917 mutant.

918

| Gene                  | Forward Primers         | Reverse Primers       |
|-----------------------|-------------------------|-----------------------|
| <b>ELF6-qPCR</b>      | CCTGGTGAATTTGTTGTGA     | GGACAGCATGGGAAGATA    |
| <b>FLC-qPCR</b>       | GCTATCAACAAGCTTC        | GCACCATGAGCTACTA      |
| <b>Actin-qPCR</b>     | GTGAGACACACCATCACCAGAAT | TGTCGCCATCCAAGCTGTTCT |
| <b>Ubiquitin-qPCR</b> | AGTTAAGAGGACTGTCTGG     | TCCTGAACCATATCCTCT    |

919

920

921  
922  
923  
924  
925  
926  
927  
928  
929  
930  
931  
932  
933  
934  
935  
936  
937  
938  
939  
940  
941  
942  
943  
944  
945  
946  
947  
948  
949  
950  
951  
952  
953  
954  
955  
956  
957  
958  
959  
960  
961  
962  
963  
964  
965  
966  
967  
968  
969  
970  
971  
972  
973  
974  
975  
976  
977  
978  
979  
980

**Data S1.** Genomic DNA Sequences of the candidate genes for pennycress domestication obtained from *Thlaspi* (*pennycress*) version 1.0 gene annotations and information on the mutation sites. (Exons – bold; Introns – small letters).

**Ta ELF6**

***Ta-elf6-1*** (highlighted red; substitution: C to T; cDNA pos:952)

ATGGGTGATGTTGAAATTCCEAATTTGGCTAAAAGCCTTGCCCTTTGGCACCTGTCTTTAGACCTACGGACACCGAATTCG  
CAGATCCTATCGCGTATATATCGAAAATCGAGAAAGAGGCCAGTGCCTTTTGGGATCTGCAAGATCATTCCTCCTTTACC  
CAAGCCGTCGAAAAGTATGTTTTCTACAACCTGAAACAAGTCTCTTTTGAGGTGTCTTGAATTGGCTTCGGATGTAGAC  
ATTTGAAAAGTGTGTCAAGAGGATAGAGCTGTGTTCAACCTAGGCAGCAAGAGTTAGGGCAGGCTGTAAAACGAAAGA  
AAGGAGGAGAGAGCAGTAAGAGCAATTTCTCAAAGGAGTGGCGTTAAGCAGGTGTGGCAAAGTGGAGGCGTGTACACGTT  
GGAGCAGTTTGAATCTAAGTCAAAAACCTTTCTACAAAAGCCAGTTAGGAACCACAAAAGAAGTGCCACCGGTTGTGGTT  
GAGGCATTGTTCTGGAAAGCAGCTTTAGAGAAGCCTATATACATAGAGTATGCAAAATGATGTGCCCTGGCTCGGCTTTCG  
GTGAACAGAGGGTCAATTTAGGCATTTTCGGCAGAGAAAGAGGAGAGGGAGAGGATTTTATCAGAGGAAGGCAGAGGT  
CAGTGAAGACAGCGGAGTAGAAAACGGGACGAATAGTCAAGAACCAACCTGCAAGAATGGTGAGAAAACATTTGCCCTGAG  
GTAGCAAAGGCATCTCTTGCTTCCGAGTTTATTATCTCAGGATCCGTCCAAGCAGAAGAACATGGATATTGTTGATG  
AAATGGAAGTACTGCAGGCTGGAAGCTTCCAACAGTTCATGGAACCTTCAGATGATTGCACGTTACCTGGATCTGT  
TACACGCTTTCATGCCAGATGACATCCCTGGTGTACATCTCCCATGGTTTATATCGGTTATGTTGTTTTCAGCTGGTTTGC  
TGGACGTTGAGGACCATGAGCTTACAGTATGAATTACCTTACACTGGCTCGCCAAAGACGTGGTACGCTGTCCCTG  
GTGATTATGCATTTGACTTTGAGAGGTTATCCGCAAAAATTCGTATGGCAGAAACATTGATCAACTGGgtactgttctt  
tctgaaaagtactgtcaaatatgataactgtttctgtttatatagaaatgtttcgttggtgtaatacatcatatcatgt  
gagaaatgagatttcttagaatgattaccgcatcatatTTTTTCTTactagcactTTTTTTTTTgctttgtaagtga  
aatgtggctgacattgactatgatatgacgagagtttgtactcttgggaaattgctttaggacttattgctttaaggtt  
attatgatagatatgagacgttgcaacacttcttatgaaatgcatgtctctctgtttctcattgactcttagctgttc  
tttctactttcagCTGCTCTCACCCAACCTAGGCGAAAAGACAACCTTTGTATCACTGAGATGATAAATTGCATCTGAC  
ATTCCTCTGCTGTAGgtaggccttttaatttttatttgaactttcacttctgtttatgtggagatgtgaggcagtttgtgtt  
ttcttataactacgccaagctctgtctatatctatTTTTTgTTTTTcccacgtagGTTGGTACAGAATCCTGGTGAATTTGT  
TGTGACTTTTTCCGAGGCTTTATCATGTAGGATTCAGCCACGgtaaaaaatgcttttttcttcaaacattcttaagtctt  
tgtgactttacttttggctcgtcccattttgcaactcttcaaagtgtgtgagaaaaatgtaaaaaattcaaaaattga  
gtaaagctttggagaaaaatgagtgttttacgacagagcataaggtgaggattgacttcttaattaggagaatgaagaa  
ccaaatTTCTatttagtagttatataaagttgcatagtaaaacggatagtttggcttcgattaggaatacaaatg  
caatattTTTTTcagaatccttaactaagcagaattaatttaacgttttaagGTTTTAACTGTGGGGAAGCCGCTAAT  
TTTGGAACTCCACAATGGCTCAACGTAGCTAAGGAAGCTGCTGTGCGACGGGCAGCCATGAATTTATCTTCCCATGCTGT  
CCCATCAGCAGCTGTATATCTCTTGACCATGTCTTTGTTTTCAAGGCAAATTTCCATGGCCTCTTTgtacatagaacc  
cttttctgctggaacctgttaatcctcatatcttctgtaaatattaaaatTTTcagAGTGCCACGATCATTACTACCAGG  
TGGTCGTAGCTCCCGACTGAGAGATCGTCAGAGAGAAGAAAGGGAGTTCTTTGTGAAAAAAGCTTTTGTAGAAGATATA  
CTGAACGAAAACAAGAATTTATCTGTTCTTCAAGCAACCGGATTTTCGTTTGGTGTGTTGGGACCCTGATTTACTCC  
CGCTCATAGTGTACATGGTCTTTGTAACCTGTTGGGGTGTCTGTTTCACTCCAGCAGAGGGAAGAAAATGAACCTGA  
GGAGAAGAATAAAGAGAAGACTACTCTTTTAGAGGAATTGAGTTTGTTCATGGAGAAGCTGAAAGATGTATACTACGAC  
GATGATGATGGTCTGCTTAATGATTTCCAGGTTGATTTCTGGAACCTTGGCATGTGTGGCGTGTGGCGTTCTTGGCTTCC  
CCTTTATGTCTGTGGTACAGCCTTCTGAAAATGCATTAATGATCTTTAGAGAGACGAGGAGAGATAGgtaacagacc  
ctcattTTTTTaaacaaactatgaaactacaccatcttctgTTTgagcctgttaattgtgcttctatctattctacagAT  
GGTCAGGAAATTCAGGCATGTTGTCCAGAAAAGTCTGACTGTGAAATGGAACATGTCTCCAGGTATATAAGACCTCGCA  
TTTTCTGCCTCGAACACACTATTGAGCTCCAGAGACTGCTGGGATCAGGAGGTGGACTGAAGTCTTGTAAATTTGCCA  
TAAAGgtaagtacgctcattttgtctattaaattcgtatgccaagagaaatattttgatcattctgttttaactttttt  
ggaattgttgcagACTTTCAAAAATTTAAGGCATATGCGGCTATAGTGGCAGAGGAAGTTAAAGTCCCTTTTACGCTATG  
ATGATATCCTGTTAGAGAGTGCATCTAAGAAGAGTTGAGTCTGATGATCTTGAATTGAAGATGAAGAAAACAACGA  
ACATGGCGTAGACTGGACCTCAAACTTGGTATCAATTTACGGTACTGTGTTAAAGTGAAGAAAATTTCCCTTCTACG  
AAAATTCAGCATGCACTGTGCTAGGTGGCTTGTCTCCGATACAAAACCATGCTAGATATGTCAACTATCAAAATGGC  
TGCAGAAAATCAGCTCAAAAGCCAAACCCAGTGTGTAACCTCAAGCTTCAACCTCGTGAACATCTTGAAGTAAAAGT  
AGACGAAAATTAGGGGAGAAGGAAAAGTTGAATCCCAAGCCGGAAGAAAAGGAAAAGATCATCCAGTACTCGAGA  
AAGAAAAGTGAAGCCCAAGCCTTCTGAAGAACGAAGTCAAGTAACCTATCTCAGCTAAATCAGAAGATTTTGA  
ACACATGCAACACACTTGCAAAAGGTCACATCATCATGGGGCAATGCATTCTGATATGAACAATGAAATTTGGAGATTT  
TGGGAGGAATGGGGTATCCTTTTTTCAGAAAATCATTGTAGCTCACCTTTCACTGGGCACGCGGACAGAACATCCAAG  
ATCATTATCAAGTTTGGCTCAGCATTACATGGGAATATTACAAGCAGTTCTAGTTTGGTGAATGGAATCTCTGCTGACC  
TAACTTCCGTAACAGAGAGACCAAGGACACTCTATGACCAGCAATAAATGGGTGCAACTCAAGTAATCATGATGG  
CCCAATAAAGCTGTCTGGTGTGAGCATGTCTGAGTGTCTGTACGTGATGTTGATGAAGCGGTTGAAATGAGCGACCAA

981 GAGTTCGAAGAAGCTGAGGTCTACCGTCACTAACATTGAGGAGGAACAGCAATCAGAGATGGTGAGACCAACCGCACTTC  
982 AGGTGGAGGGAGAGGAATCTATGTGTACGAGAGAAATCTTGAGCTCTGAAGATATATATGCACACTGAGCAGCAGCAAGA  
983 GCAAACCTCAACTGGGTTTAGAAGTTCTGAAACTGACATTGCCAGTGAGAACATAGTTGTGGACATGATCCATGATGAT  
984 GAACCTCTGGCACTAGGGATATATTAAGTTCAAGCAACGGTGATCAAGCTTCTCAATGGCTTGAAGCTCTAGATA  
985 ATGAACTTAGCATGGAGAGCGAAGTTGCAAGCTCAGAAAACACCGAGGTTATAGAGGCGTCGCCAATTCTATTATGCG  
986 AGAAGCAAATAAGAAGCGGAGAATAGAATCAGAGTCTGAGACAAATGATAATCCAGATGGTAGCATTGGTTTTCATAAGG  
987 AGTCCCTGTGAAGGGTTGAGGTCAAGGGGTAGGAGGAGAGTGACGCGTGAAGCTTCAGTCAGTCTCACTGAAACGAGCG  
988 ATGAAGAGAAGAAACCCGCTGCGAAAAGGTTCAAGAAAACCTCCAAAGACTCGCTCGGGGAGTCATACCAAGAAGACTC  
989 CACGACAAGTCAACCAACCGTTGTAACCTAGAGGGATGCAAGATGACTTTCAAGAGTAAAGCAGAGTTACAAGCTCAC  
990 CAAAGAAAACCGCTGCGCACATGAAGGGTGTGAAAAAAATTCAGGGCTCACAATATCTGGTGCCTCATCAACGTGTTT  
991 ATAACGATGATAGACCTTTTGTGTCTCTTGAAAGGATGTTCCATGACTTTCAAATGGCCATGGGCGAGGACCGAGCA  
992 TTTGCGTCTGCACAGGGAGACCGACCATACAATGCAAGTTCGATGGATGTGGAATGTCGTTTAGGTTTGTGTGCGGAT  
993 TACAGCCGCATAGACGAAAAAGGGCATTATGTGACATAG

994

995

996 **Ta IND**

997 **Ta-ind-1** (highlighted red; substitution: C to T; cDNA pos:247)

998 **Ta-ind-2** (highlighted red; substitution: G to A; cDNA pos:260)

999 **Ta-ind-3** (highlighted red; substitution: G to A; cDNA pos:301)

1000

1001 ATGAATTGGAACAAACCTAATGATCTCATCACACAAGAATACCCCTTCTCCAGATCCTCATCTCATGATAGATCCAC  
1002 CTCCGAAACCCCTAAGTCATTTCCAGCCCCCGCCGACACTTTTCTCCGGTCACGGAGGGGAGGAAGAAGAAGAAGA  
1003 TAATGAAGAGGAAGAGATGGATGCGATGAAGGAGATGCAGTACACGATCGCTGCCATGCAGCCCGTGGACATCGATCCA  
1004 GCCACCGTTCTAAACCGAACCCTGTAACGTAAGGGTAAGCCAGCACACTCAGACGGTGGTACTCGTCGGCGTCGAG  
1005 AAAAGATAAGCGAGAAGATCCGAATATTGAAGAGGATGGTGCCAGGCGGTGCGAAGATGGACACAGCCTCCATGCTCGA  
1006 CGAAGCCATCCGTTATACCAAGTTCTTGAAACGGCAGGTGAAGCTTCTTCAGCCTCACTCTCAGCTTGGAGCTCCTATG  
1007 TCTGACCCCTCTTGCCCTTGTATTACCACAACCTCCCAAACCTAA

1008

1009

1010 **Ta AOP2**

1011 **Ta-aop2-1** (highlighted red; substitution: G to A; cDNA pos:289)

1012

1013 ATGGGTTCACTTTCAAACACTCCTCAGCTTCCAGTCATCTACCTCTCGGACCAAACCCCTAAAACCGGAAGCTCAAAGT  
1014 GGGTTGAAGTCAGGAGTGATGTCCGTAAAGCTTGAAGAGTACGGCGGTTTCGAGGTGTCGTACGATAGAGTGTCCGGA  
1015 GGAGCTTAAGAAGTCCGGTTTGAAGCCATGGAAGAGCTTTTCGCGTTACCAGTTGAGGCTAAACAGAGAAACGCTCTCT  
1016 CCTAAACCCCTCAGCGGTTATTCCACTCATAACGGTCTTTCCGAGAGTATGGGATCCAGGATCCTCATGTTTTGGACA  
1017 AAGTTTACGAGTTTACTCAACTTCTACGTCCTGATCATTGTGACGGTAACAAGAGCATCAGgtaatttgtgaaaaatac  
1018 tcaatattgcttcataataaaaaataactcaatattgcttcctaatcttttggcagtttatttctactacataaaaaataa  
1019 acccgcttttacatttttattgtttgtgtataagaatattagttcactcaaacagcatgaaactaataattgaaattt  
1020 tgtatttgtgtgaaaaactttagttcacttaataaacatttttgttgtttgtgtgtaaacagCGAAACGATCCAGAGC  
1021 TTTTCAGAGAAgttatcagaattggatataatggtgagaagaatggtaatggaaagcttcgggatagagaagtaccttg  
1022 acaaacacctgaactcaacgaattaccgctctgcgctgatgaagatataagcaccgctgatgctgatgctactaatgt  
1023 tgcgctgatgccaaagatgctgatgataatgctaagacgattacaatgataaaagttgatgctgctgctaatgat  
1024 gtagatgctggtgataatcgctaatggtattgctaatcttcatattggtgatgatgctaacgctggtgctaatggtgctg  
1025 gtgttgatgctaatgatggtggtgaggatgctaagactggtgaggatgctaagactggtgaaatgtgctagtgttaagtc  
1026 taatgccgaagatggtactgatgtaaatgccagTGCTGATGCTGGTGTACTGTTGGCTCTAATGCTGATGCTAATGCT  
1027 AATGCTAATGCTAATACTAGTACTGATGCTGGTGTGGCGATAGTGTAAAGCTAATGGTGGTGCATGATGTTGAGA  
1028 AGAAATGGGTCTACCTTCTCACACTGATAAGAACCTTATAACCGTGTCTTATCAATACGAGATTGAAGGTTGGAGGT  
1029 TCTAACCAAGATGACAAGTGGATCAGACTCAAACCTCATAAATCTTTTCGTTGTTATGGCTGGAGATTCTCTATAC  
1030 gtaagtttccaactctctctctctctctttttcttttttaagttgacactcacagctactgacgtacacgcttgggtgg  
1031 atttaaaagtaaccctagtggaagaagaagatgaattttcatttacattatatacataaacctactttttaaattagaata  
1032 agaataattaaaactaaaccattttttattggctcactatggcctaagaataataattaaaatattataggtcaa  
1033 taagtcataatattcttagcctatagaatatttttaaagtatcaataattaaaatttttatagcatatagaatat  
1034 tttatgggctcaataattacaagtattctacaggatcaccatggcctaagaataatcaaaagtaaacgaaatttttaa  
1035 attacaggtatagagaagaagaaaaagaagtaaaattaaaaccaagaataagttaaaatgtagagaagtaacaacac  
1036 ttatggcgaaaaagagaaaaagattattttagctcactgtcagctcactatggaccaacttatcctatagaaacta  
1037 ttaataattttcttgattttattcctcttcttcttcaaacagtgcatggttgactaaaagcgttataacatgatggtt  
1038 tgttttctctgatcatgatctcttctgctgttacttacaacaaaacaaatgggtgattttgtttttttttgtcag  
1039 GCAC TTATGAATGGTAGACTAACTCGTCCCTTTTCAFCGAGTAAGAGTAACGGAGAAAAGAAGACAAGATATTCATAG

1040 CATTGTTCTCGGCTCCAACCGCAGATTACATCATAGACACACCAAAGAAGCTTGTGGACGAGAAGCATCCACGTATCTT  
1041 CGAACCATTTAACTATAACGACTTGATGAGTTTTCTATCATAGTGAAGCTGGTCTGTAAGCTCGATCTACTCTTGATGCT  
1042 TTCTGTGCCGTCTCTCGAGCATAA

1043

1044

### 1045 Ta FAE1

1046 *Ta-FAE1-1* (highlighted red; substitution: C to T; cDNA pos:1018)

1047 *Ta-FAE1-2* (highlighted red; substitution: G to A; cDNA pos:1349)

1048

1049 ATGACGTCCGTTAACGTTAAGCTCCTTACCATTACGTCATCACCAACTTTTTCAACCTTTGCTTCTCCCGTTAGCGG  
1050 CGATCGTTGCCGGAAGCCTCTCGGCTTACCACAAACGATCTTACCACCTTCTACTATTCCATCTCCAACACAACCT  
1051 AATAACCATATCTCTACTCTTTGCCCTTACCCTTTTCGGTTTGGCTCTCTACATCGTAACCCGGCCAAACCGGTTTAC  
1052 CTCGTTGACCATTCTGCTACCTTCCACCATCGCATCTTAGAAGCAGTATCTCTAAGGTCATGGATATCTTCTATCAAG  
1053 TAAGATTAGCCGATCCTTTACGGAACCGCGGCAAGCGATGATTCTGCTTGGCTTGTATTTCTTGAGGAAGATTACAGGAGCG  
1054 GTCTGGTCTAGGCGATGAAACCCACGGCCCGAGGGACTGCTTCAGGTCCTCCACGGAAGACTTTTGCCGCGGCGCGT  
1055 GAAGAAACAGAGCAAGTATCATCGTCCGCTCGAAACTATTCGAGAACACCAAGTTAACCTAAAGAGATTGGTA  
1056 TACTTGTGGTGAACCAAGCATGTTAATCCGACTCCTTCGCTCTCGGCGATGTTGTTAATACCTTCAAGCTCCGGAAG  
1057 CAACATCAGAAGCTTTAATCTTGGAGGAATGGGTTGTAGTGCCGGCGTTATAGCCATTGATCTGGCTAAGGACTTGTG  
1058 CATGTCATAAAAACACTTATGCTCTTGTGGTGAGCACAGAGAATCACTTACAACATTTATGCTGGTGATAACAGAT  
1059 CCATGATGGTTTTCGAATTGCTTTCGCTGTTGGTGGGGCCGCGATTTTGGCTCTCCAACAAGCCGAGGGACCGGAGACG  
1060 GTCCAAGTACCAGCTACTTTCACACGGTTCGGACGCATACCGGAGCTGACGACAAGTCTTTCCGATGTGTGCAACAAGAA  
1061 GACGACGAGAGCGGTAACCCGGGGTGTGTTTGTCCAAGGACATAACCGGTGTTGCCGGGAGAAGTGTAGAAAAACA  
1062 TAACAACATTGGTCCGTTCTCTCTTTAGCGAAGAAATTTCTTTTTTTCGTTACCTTACCTCGCCAAGAACTCTT  
1063 TAAAGACAAGATCAACATTACTACGTCGCGGATTTCAAGCTTGCATCGACCAATTTTGTATTATCGCCGGAGGACAGA  
1064 GCCGTGATCGATGTGCTACAGAAGAACTTAGGTCTATTGCCGATCGATGTGGAGGCATCTAGGTCAACGTTACATAGAT  
1065 TTGGGAACACTTCGCTAGCTCAATTTGGTATGAATTGGCGTACATAGAGGCAAAAGGAAGGATGAAGAGAGGGAACAA  
1066 AGTTTGCAGATTGCTTTAGGGTCAGGGTTTTAAGTGAATAGTGCGGTTTGGGTGGCTCTACGCAATGTCAAGGCTTCG  
1067 ACAATAGTCTTGGGAACATTGCATTGATAGATATCCAGATGCAATGATTCTGATTCCGGTAAGTCAGAGACTCGTG  
1068 TCCAAAACGGTCGGTCTCTAA

1069

1070

### 1071 Ta ROD1

1072 *Ta-rod1-1* (highlighted red; substitution: C to T; cDNA pos:678)

1073 *Ta-rod1-2* (highlighted red; substitution: C to T; cDNA pos:743)

1074

1075 ATGTCAACTAAAACCGTTCGTCCTCTCCGTCGCAGATCTAAGCCCTTAACGGAAATCACACTAACCGGCTCGCCATTG  
1076 ACGGAAGCCTCGACGACGACCACAACCGTCGCATCGGATCAGTAAATAGCCAAATGGATAACATTGCTAAGAAAACGGA  
1077 CGACGGCTACGCAACCGCGGAGGAGGAGGAGGAGGAAAAGCAAGGCGTCTTTATGACGTGGACGGCGCTGAC  
1078 GTTGTGTACGTGGCGAGGTACCATTGGATACCGTGTGTTGTTTCGCGGTCGGGGTCTGTTCTTACGGGCGTGGAGTACA  
1079 CGCTCCAGATGATCCCGCGAGGTCAGCCGTTTCGATATTGGGTTTGTGGCCACGCGCTCTCTGAATCGCGTCTTGGC  
1080 AAATTCACCGGATCTTAACACCGTCTTAGCCGCTTAAACACGgtaatttcgtactaattaatttagggtaaaaaatat  
1081 agtatttaataatgactatcctcaattcctttcatgcttcacctaataatatttggtttttttctgcttgcattaaaaatcgt  
1082 aataatataattgagtttagtcaaatgaaaaaaacaagtggcggtagtgttggaacaaatctcagatcctttatctggt  
1083 taataaggatatttaattatccagctggaattatgctgtcaagtgtcaacacagtagtagtaacatgcaatggaatttct  
1084 caatagaaaaaggtccttaattagtagataaattagtggaacaaaaatgtagttaatgtaactcctttgctaaagttagta  
1085 tcataatcatcttttaacaactgccattttgtctgtgtgtttgttttacaacgaagtagtagtagaataagatcgtctt  
1086 ttagcttttgaaagtttgcgaacccaaggaaaaggacacatgggttatgagttggagacacgatcacatgcaaacagag  
1087 agattgggttaaatatcogactttttgtagtacttttaaaaaaaaactatttatataaaaaaacatgggtggatggtgggg  
1088 acagGTGTTTCGTAGGGATGCAACGACGTATATTGTATGGACATGGTTAATGGAAGGACGACCAGGACCACCATCTCG  
1089 GCTTGCTTCATGTTACTTGTGCGAGGCATTTGGTTACTCTACTCAGCTCCCTCTTCTCAGgttccaatcaacactt  
1090 ttctctatctcttttcttaattaaataattaccaataacttaactaaatgctaataatcagtcgataatcatagttccaacgt  
1091 tttgacgtgtgatttccattggcactaccatataaaacaacagagtccttttattcattatcaatataatatttgag  
1092 tattgatattattcatagggaggtttcatttgtactatcaataaaaatttctacaactcctggattttttctgctacatt  
1093 ttgtagttatttttttaattacttttaaaaacttgtgaataggagagactaatagtagtagtaaatatgattgtatcaa  
1094 atgcttaacatgtggggtttgggttaactatcatcatttcatagatcactattttggtttctggttacctaacttt  
1095 ttggtatctttgaaaaataatgttccacgagttgattgactggacataaaaaatcagattctctcactcatttacgttct  
1096 acggttctagccactcgtttttttctttctctgtggtgtaaacgtagataatggattttctatggtgtcgtct  
1097 tgctcaagaataataatgtgggttaagggttaatatagctctggaaatataattatctcctcttttttttataaccagG  
1098 ATTTTCTAGGATCAGGTGTCGATTTCCGGTGGGAAACGCTCTCGTTCTTCTCTACTCGGGTCACGTCGCCGGTTC  
1099 GATGATCGCATCTTTGGACATGAGGAGAATGCAGAGGATGAGACTAGCGATGCTTTTGGACATCTCAATGTATTACAA

1100 TCGATCAGGCTGCTCGGGACGAGAGGACACTACACGATTGATCTCGCTGTCGGAGTTGGCGCTGGGATTCTCTTTGATT  
1101 CATTCCCGGCAAGTACGAAGAGATGATAAGCAAGAGACACAATTTAGTCAATGGTTTTGGTTTGATTTCGAAAGACTC  
1102 GCTAGTCAATTAA  
1103  
1104

1105 **Data S2.** Predicted protein sequences of the candidate genes for pennycress  
1106 domestication obtained from *Thlaspi* version 1.0 gene annotations and mutation  
1107 and information on the mutation sites.

1108  
1109 **Ta ELF6**

1110 ***Ta-elf6-1* (bold red; Substitution: His to Tyr; AA pos:318)**

1111  
1112 MGDVEIPNWLKALPLAPVFRPTDTEFADPIAYISKIEKEASAFGICKIIPPLPKPSKKYVFYNLNKSLLRCELASDVD  
1113 ISKVCQEDRAVFTTRQQELGQAVKRKKGESSKNSQRSQVQVWQSGGVYTTLEQFESKSKTFYKSQLGTTKEVPPVVV  
1114 EALFWKAALKPIYIEYANDVPGSAFGEPEGHFRFRQRKRGRGFYQRKAEVSEDSGVENGTNSQEPTCKNGEKTLP  
1115 VAKASLASPSLLSQDPSKQKNMIDVDEMEGTAGWKLNSNSWNLQMIARSPGSVTRFMPDDIPGVTSPMVYIGMLFSWFA  
1116 W<sup>H</sup>VEDHELHSMNYLHTGSPKTWYAVPGDYAFDFEEVIRKNSYGRNIDQLAALTQLGEKTTLVSPEMI IASDI PCCRLVQ  
1117 NPGEFVVTFPRSYHVGFSGHFNCGEAAANFGTPQWLVNAKEAAVRAAMNYLPMLSHQQLLYLLTMSFVSRQISMASLVP  
1118 RSLLPGGRSSRLDRQREEREFVVKAFVEDILNENKNLSVLHREPGRFRLVMWDPDLLPRHSHVHGLVTVGGAAVSSPAE  
1119 GKNELEEKNKEKTTLEELSLFMEKLDVYYDDDDGLLNDVQVDSGTLACVACGVLGFPFMSVQPSENALNDLSERRG  
1120 EIDGQEITALLSEKSDCEWNMSSRYIRPRIFCLEHTIELQRLLESRGGKFLVICHKDFQKFKAYAAIVAAEEVKVPFSY  
1121 DDILLESASKEELSILDLAIEDEENNEHGVWDWTSKLGINLRYCVKVRKNSPSTKIQHALSLGGLFSDTNHMLDMSTIKW  
1122 LQRKRSKAKPSCSTSSFTPREHLEVKVDRKLGEKEKVESQAGRKEEKIIQYSRKKKLPKPKSEERSQELTISAKSEDFE  
1123 NTCNTLAKRSHHHGAMHSDMNNEIGDFGRNGVSFSENHCSSPFTGARGQEHKIIKFGSALHGNITSSSSLVNGISAD  
1124 LTSVTREHQGHSMSTSNNGSNSSNHGPIKLSGEHVSVDVSRVDVEAVEMSDQEFEEELRSTVTNIEEEQQSEMVRPTAL  
1125 QVEGEEISMCTREILSSEDIHMQEQEQTQLGLEVPETDIASENIVVDMIHDDEPLATRDILSSSNGDQASSNGLQALD  
1126 NELSMEEVASENTEVIEASPNSIMREANKKRIESESETNDNPDGSI GFIRSPCEGLRSRGRRTREASVSLTETS  
1127 DEEKPAAKRFKTKPTRSGSHHQEDSTTSHNRCNLEGCKMTFKSKAELQAHQRNRCHEGCGKFKRAHKYLVLHQRV  
1128 HNDDRPFVCSWKGCSMTFKWPWARTEHLRLHTGERPYKCKVDGCGMSFRFVSDYSRHRKKGHYVT

1129

1130

1131 **Ta IND**

1132 ***Ta-ind-1* (bold red; Substitution: Pro to Ser; AA pos:83)**

1133 ***Ta-ind-2* (bold red; Substitution: Arg to His; AA pos:87)**

1134 ***Ta-ind-3* (bold red; Substitution: Ala to Thr; AA pos:101)**

1135

1136 MNWNKPNLDITQEYFPLHDPHLMIDPPPETLSHFQPPPTLFSGHGEEEEEDNEEEEMDAMKEMQYTIAMQPVDIDP  
1137 ATV<sup>P</sup>KPN<sup>R</sup>RNVRVSDDTQT<sup>V</sup>V<sup>A</sup>RRRREKISEKIRILKRMVPGGAKMDTASMLDEAIRYTKFLKRQV<sup>K</sup>KLQPHS<sup>Q</sup>LGAPM  
1138 SDPSCLCYHNSQT\*

1139 Conserved bHLH region is underlined.

1140

1141 **Ta AOP2-like**

1142 ***Ta-aop2-1* (bold red; Substitution: Gly to Arg; AA pos:97)**

1143

1144 MGSLSNTPQLPVIYLS<sup>D</sup>QTLKPGSSKWVEVRS<sup>D</sup>VRKALEEYGGFEVSYDRVSEELKKS<sup>V</sup>LQAMEELFALPVEAKQRNVS  
1145 PKPFGYSTHNGLSESM<sup>G</sup>IQDPHVLDK<sup>V</sup>YEFTQLLRPDHCDGNKIS<sup>E</sup>TIQTFS<sup>E</sup>NADAGVT<sup>V</sup>GSNADANANANANTST  
1146 DAGVGD<sup>S</sup>VKANGGADDVEK<sup>K</sup>LGLPSHTDKNLIT<sup>V</sup>LYQYEIEGLEVLTKDDK<sup>W</sup>IRLKP<sup>S</sup>HNSFVVMAGDSLYALMNGRLT  
1147 RPFHRVRVTEKKKTRYSIALFSAPTADYI<sup>I</sup>DTPKELVDEKHPRI<sup>F</sup>EPFN<sup>Y</sup>NDLMSFYHSEAGR<sup>K</sup>ARSTLDAFCAVSRA

1148

1149

1150 **Ta FAE1**

1151 ***Ta-fae1-1* (bold red; Substitution: Gln to stop; AA pos:340)**

1152 ***Ta-fae1-2* (bold red; Substitution: Trp to stop; AA pos:450)**

1153

1154 MTSVNVKLLYHYVITNFFNL<sup>C</sup>FFPLAAIVAGKASRLT<sup>T</sup>NDLHHFYYSYLQHNLI<sup>T</sup>ISLLFAFTV<sup>F</sup>GLALYIVTRPKPVY  
1155 LVDHSCYLPPSHLRSSISKVMDIF<sup>Y</sup>QVRLADPLRNAASDDSSWLD<sup>F</sup>LRKI<sup>Q</sup>ERSGLGDETHGPEGLLQVPPRKTFAAAR  
1156 EETE<sup>Q</sup>VIIGALEKLFENTKVNPK<sup>E</sup>IGILVVNSSMFNPT<sup>S</sup>LSAMVNT<sup>F</sup>KLRSNIRSFNLGGMGCSAGVIAIDLAKDLL  
1157 HVHKNTYALVVSTENIT<sup>Y</sup>NIYAGDNRSMVSNCLFRVGGAAI<sup>L</sup>LSNKPRDRRRSKYQLLHTV<sup>R</sup>THTGADDKSFRCVQ<sup>Q</sup>E  
1158 DDES<sup>G</sup>TGVCLSKDITGVAGRT<sup>V</sup>QKNITTLG<sup>L</sup>PLVLPFSEK<sup>F</sup>LFFVTFI<sup>A</sup>KKL<sup>F</sup>KDKIKHY<sup>Y</sup>VPDFKLAIDHFCIHAGGR  
1159 AVIDL<sup>V</sup>LQKNLGLLPIDVEASRSTL<sup>H</sup>RF<sup>G</sup>NTSSSSIWYELAYIEAKGRMKRGNK<sup>V</sup>WQIALGSGFKCNSAVVVALRNVKAS  
1160 TNSPWEHCIDRYPDAIDS<sup>S</sup>SGKSETRVQNGRS\*

1161

1162

1163 **Ta ROD1**

1164 ***Ta-rod1-1* (bold red; Substitution: Met to Ile; AA pos:226)**

1165 ***Ta-rod1-2* (bold red; Substitution: Arg to Lys; AA pos:248)**

1166

1167 MSTKTVVPLRRRSKPLNGNHTNGVAIDGSLDDDHNRRIQSVNSQMDNIAKKTDDGYANGGGGGGGKSKASFMTWTARD

1168 VVYVARYHWIPCLFAVGVLFFFTGVEYTLQMI PARSEPFDIGFVATRSLNRVLANS PDLNTVLAALNTVFVGMQTTYIVW

1169 TWLMEGRPRATISACFMFTCRGILGYSTQLPLPQDFLGSQVDFPVGNSVFFLFYSGHVAGSMIASLDMRRMQRMRLAML

1170 FDILNVLQSI<sup>R</sup>LLGTRGHYTIDLAVGVGAGILFDSFAGKYEEMI SKRHNLVNGFGLISKDSL<sup>N</sup>\*  
1171



1172 **Data S3.** Protein sequence alignments of *Thlaspi arvense* (pennycress) wild-type  
1173 sequences with the corresponding mutant and orthologous *Arabidopsis* sequences. At the  
1174 locations of the mutations, wild-type amino acids are highlighted in red and mutant  
1175 amino acids in blue.

1176  
1177 **ELF6 - EARLY FLOWERING 6 (AT5G04240)**

1178 At-ELF6 MGNVEIPNWLKALPLAPVFRPTDTEFADPIAYISKIEKEASAFGICKIIPPLPKPSKKYV  
1179 Ta-ELF6 MGDVEIPNWLKALPLAPVFRPTDTEFADPIAYISKIEKEASAFGICKIIPPLPKPSKKYV  
1180 Ta-elf6-1 MGDVEIPNWLKALPLAPVFRPTDTEFADPIAYISKIEKEASAFGICKIIPPLPKPSKKYV  
1181 \*\* :\*\*\*\*\*  
1182  
1183 At-ELF6 FYNLNKSLLKCPPELVSDVDISKVCKEDRAVFTTRQQELGQTVKKNK-GEKGSNSQSRGV  
1184 Ta-ELF6 FYNLNKSLLRCPPELASDVIDISKVCQEDRAVFTTRQQELGQAVKRKKGESSKNSQSRGV  
1185 Ta-elf6-1 FYNLNKSLLRCPPELASDVIDISKVCQEDRAVFTTRQQELGQAVKRKKGESSKNSQSRGV  
1186 \*\*\*\*\* :\*\*\*.\*\*\*\*\* :\*\*\*\*\* :\* : \* \* ..\*\*\*\*\*  
1187  
1188 At-ELF6 KQVWQSGGVYTLDQFEAKSKAFYKTLGTVKELAPVVIEALFWKAALEKPIYIEYANDVP  
1189 Ta-ELF6 KQVWQSGGVYTLQFESKSKTFYKSQLGTTEKVPVVEALFWKAALEKPIYIEYANDVP  
1190 Ta-elf6-1 KQVWQSGGVYTLQFESKSKTFYKSQLGTTEKVPVVEALFWKAALEKPIYIEYANDVP  
1191 \*\*\*\*\* :\*\*\*:\*\*\*:\*\*\*:\*\*\* :\* : \* :\*\*\*\*\*  
1192  
1193 At-ELF6 GSAFGEPEDEHFRHFRQRKRGRGFYQRKTENN-----DPSGKNGEKSSPEVEK  
1194 Ta-ELF6 GSAFGEPEGHFRHFRQRKRGRGFYQRKAEVSEDSGVENGTNSQEPTCKNGEKTLPPEVAK  
1195 Ta-elf6-1 GSAFGEPEGHFRHFRQRKRGRGFYQRKAEVSEDSGVENGTNSQEPTCKNGEKTLPPEVAK  
1196 \*\*\*\*\* .\*\*\*\*\* :\* . :\* :\*\*\*\*\* : \* \*  
1197  
1198 At-ELF6 APLASTSLSSQDSSKQKNMDIVDEMEGTAGWKLSNSSWNLQMIARSPGSVTRFMPDDIPG  
1199 Ta-ELF6 ASLASPSLLSQDPSKQKNMDIVDEMEGTAGWKLSNSSWNLQMIARSPGSVTRFMPDDIPG  
1200 Ta-elf6-1 ASLASPSLLSQDPSKQKNMDIVDEMEGTAGWKLSNSSWNLQMIARSPGSVTRFMPDDIPG  
1201 \* \* \* \* \* \*\*\*\*\*  
1202  
1203 At-ELF6 VTSPMVYIGMLFSWFAWVEDHELHSMNYLHTGSPKTYAVPCDYALDFEEVIRKNSYGR  
1204 Ta-ELF6 VTSPMVYIGMLFSWFAWVEDHELHSMNYLHTGSPKTYAVPGDYAFDFEEVIRKNSYGR  
1205 Ta-elf6-1 VTSPMVYIGMLFSWFAWVEDHELHSMNYLHTGSPKTYAVPGDYAFDFEEVIRKNSYGR  
1206 \*\*\*\*\* :\*\*\*\*\* \* \* :\*\*\*\*\*  
1207  
1208 At-ELF6 NIDQLAALTQLGEKTTLVSPMIVASGIPCCRLVQNPGEFVVTFPFRSYHVGFSHGFCNGE  
1209 Ta-ELF6 NIDQLAALTQLGEKTTLVSPMIIASDIPCCRLVQNPGEFVVTFPFRSYHVGFSHGFCNGE  
1210 Ta-elf6-1 NIDQLAALTQLGEKTTLVSPMIIASDIPCCRLVQNPGEFVVTFPFRSYHVGFSHGFCNGE  
1211 \*\*\*\*\* :\* . \*\*\*\*\*  
1212  
1213 At-ELF6 AANFGTPQWLNVAKEAAVRRRAAMNYLPMLSHQQLLYLLTMSFVSR-----VPRSLLP  
1214 Ta-ELF6 AANFGTPQWLNVAKEAAVRRRAAMNYLPMLSHQQLLYLLTMSFVSRQISMASLVPRSLLP  
1215 Ta-elf6-1 AANFGTPQWLNVAKEAAVRRRAAMNYLPMLSHQQLLYLLTMSFVSRQISMASLVPRSLLP  
1216 \*\*\*\*\* \*\*\*\*\*  
1217  
1218 At-ELF6 GRSSRLRDRQREEREFLVKRAFVEDILNENKNLSVLLREPGSRLVMWDPDLLPRHSALAL  
1219 Ta-ELF6 GRSSRLRDRQREEREFLVKRAFVEDILNENKNLSVLLHREPGFRLVMWDPDLLPRHSVHGL  
1220 Ta-elf6-1 GRSSRLRDRQREEREFLVKRAFVEDILNENKNLSVLLHREPGFRLVMWDPDLLPRHSVHGL  
1221 \*\*\*\*\* :\*\*\*\*\* \* \* \* \*\*\*\*\* . \*  
1222  
1223 At-ELF6 AAAGVAGASAVSPPAVAKKELEEGHSELQNKETSLLLEELSLFMEKLNVDVYDDDDGLLN  
1224 Ta-ELF6 VTVG---GAAVSSPAEGKNELE-----EKNKEKTTLLEELSLFMEKLNVDVYDDDDGLLN  
1225 Ta-elf6-1 VTVG---GAAVSSPAEGKNELE-----EKNKEKTTLLEELSLFMEKLNVDVYDDDDGLLN  
1226 :.\* .:\*\*\* \* .:\*\*\* :\*\*\*\*\* :\*\*\*\*\*  
1227  
1228 At-ELF6 DFQVDTGTLPCVACGVLGFPFMSVQVPSKALKDLSEKQGETDAQEIMTSLSEKSDCEWK  
1229 Ta-ELF6 DFQVDSGTLACVACGVLGFPFMSVQVPSKALNDLSEKQGETDAQEIMTSLSEKSDCEWN  
1230 Ta-elf6-1 DFQVDSGTLACVACGVLGFPFMSVQVPSKALNDLSEKQGETDAQEIMTSLSEKSDCEWN  
1231 \*\*\*\*\* :\* \* \*\*\*\*\* :\* :\*\*\*\*\* :\* \* \* \* : \* \*\*\*\*\* :  
1232

1233  
1234 At-ELF6 TSSRYIRPRIFCLEHTIELQRLLQSRGGLKFLVICHKDFQKFKAAHAAIVAEVVKVPPFSYD  
1235 Ta-ELF6 MSSRYIRPRIFCLEHTIELQRLLQSRGGLKFLVICHKDFQKFKAYAAIVAEVVKVPPFSYD  
1236 Ta-elf6-1 MSSRYIRPRIFCLEHTIELQRLLQSRGGLKFLVICHKDFQKFKAYAAIVAEVVKVPPFSYD  
1237 \*\*\*\*\*:\*\*\*\*\*:\*\*\*\*\*  
1238  
1239 At-ELF6 DVLLSASQEELSILDLAIEDEEKYEHSVDWTSELGINLRYCVKVRKNSPTKKIQHALSL  
1240 Ta-ELF6 DILLESASKEELSILDLAIEDEENNEHGVDWTSKLGINLRYCVKVRKNSPSTKIQHALSL  
1241 Ta-elf6-1 DILLESASKEELSILDLAIEDEENNEHGVDWTSKLGINLRYCVKVRKNSPSTKIQHALSL  
1242 \*:\*\*\*\*\*:\*\*\*\*\*:\*.\*\*\*\*\*:\*\*\*\*\*:\*\*\*\*\*  
1243  
1244 At-ELF6 GGLFSDTSQMLDFTTIRWLQRKRSKAKPSSTSSFTPCEHLEVKADGKLR--DNLDSQTG  
1245 Ta-ELF6 GGLFSDTNHMLDMSTIKWLQRKRSKAKPSTSSFTPCEHLEVKVDRKLGEEKESQAG  
1246 Ta-elf6-1 GGLFSDTNHMLDMSTIKWLQRKRSKAKPSTSSFTPCEHLEVKVDRKLGEEKESQAG  
1247 \*\*\*\*\*.:\*:\*:\*:\*:\*:\*:\*:\*:\*:\*:\*:\*:\*:\*:\*:\*:\*:\*:\*:\*:\*:\*:\*:\*:\*:\*:\*  
1248  
1249 At-ELF6 KKEEKIIQYSRKKKLNPKPSAEQVQELATLAKSKDFDKTCKNFSSRSHLDSAIRSEMNSE  
1250 Ta-ELF6 RKEEKIIQYSRKKKLNPKPSEERSQELTISAKSEDFENTCNTLAKRSHHGAMHSDMNNE  
1251 Ta-elf6-1 RKEEKIIQYSRKKKLNPKPSEERSQELTISAKSEDFENTCNTLAKRSHHGAMHSDMNNE  
1252 :\*\*\*\*\*:\*\*\*\*\*:\*.\*\*\*\*\*:\*\*\*\*\*:\*\*\*\*\*:\*\*\*\*\*:\*\*\*\*\*:\*\*\*\*\*:\*\*\*\*\*  
1253  
1254 At-ELF6 IGDSGRVIGVSFSINPCSSSFTVGHGQEHPEITVKFGSDLDGNVTNSLSMVNGDSADLT  
1255 Ta-ELF6 IGDFGR-NGVSFSENHCSSPFTGARGQEHPKIIKFGSALHGNTSSSSLVNGISADLTS  
1256 Ta-elf6-1 IGDFGR-NGVSFSENHCSSPFTGARGQEHPKIIKFGSALHGNTSSSSLVNGISADLTS  
1257 \*\*\* \*\* \*\*\*\*\* \* \*\* \* \* .:\*\*\*\*\*:\* :\*\*\*\* \*.\*:\*:\* \*.\*:\*\*\* \*\*\*\*\*  
1258  
1259 At-ELF6 TSISREQHQGHSMTSNNNGSNSGSHVVASQTILVSTGDNDHGPRKLSGDYVCSDVSVRGI  
1260 Ta-ELF6 V---TREHQGHSMTSNNNGSNS-----SNHDGPIKLSGEHV-SDVSVRDV  
1261 Ta-elf6-1 V---TREHQGHSMTSNNNGSNS-----SNHDGPIKLSGEHV-SDVSVRDV  
1262 . .:\*\*\*\*\*:\*\*\*\*\*.\*\*\*\*\* \*\*\*\*\*:\*.\*\*\*\*\*.:  
1263  
1264 At-ELF6 QEAVEMSDQEFEGPRSTVTNIEDEQQSQIVKPTQREAVFGDHEQVEGAEAVSTRENLCSE  
1265 Ta-ELF6 DEAVEMSDQEFELRSTVTNIEEEQQSEMVRPTAL-----QVEGEESMCTREILSSE  
1266 Ta-elf6-1 DEAVEMSDQEFELRSTVTNIEEEQQSEMVRPTAL-----QVEGEESMCTREILSSE  
1267 :\*\*\*\*\* \* \*\*\*\*\*:\*\*\*\*\*:\*.\*\*\* \*\*\*\*\* \*:\*.\*\*\* \*.\*  
1268  
1269 At-ELF6 IILTHEHS--SAHVGMEIPDINTASENLVDMTHDGEPLESSDILSSSNGDEASSNGLQV  
1270 Ta-ELF6 DIMHTEQQEQTLGLEVPETDIASENIVVDMIHDDDEPLATRDILSSSNGDQASSNGLQA  
1271 Ta-elf6-1 DIMHTEQQEQTLGLEVPETDIASENIVVDMIHDDDEPLATRDILSSSNGDQASSNGLQA  
1272 \*:\*\*\*:.. .:\*\*\*:\*\*\*:\*. \*\*\*\*\*:\*\*\*\*\*:\*\*\*\*\*:\*\*\*\*\*:\*\*\*\*\*.  
1273  
1274 At-ELF6 LDNELSMSEVSSSENTEVIEAP--NSMGEAKKRRKIESESETNDNPDSIGFIRSPCEG  
1275 Ta-ELF6 LDNELSMSEVASSSENTEVIEASPNSIMREANKRRRIESESETNDNPDSIGFIRSPCEG  
1276 Ta-elf6-1 LDNELSMSEVASSSENTEVIEASPNSIMREANKRRRIESESETNDNPDSIGFIRSPCEG  
1277 \*:\*\*\*\*\*:\*\*\*\*\*. \* \*\*:\*:\*:\*:\*:\*:\*:\*:\*:\*:\*:\*:\*:\*:\*:\*  
1278  
1279 At-ELF6 LRSRGRKATCETSLKHTETSDEEKKPIAKRLKKTPKACSGSRQQEVPTTHPNRCYLEG  
1280 Ta-ELF6 LRSRGRRRVTREASVSLTETSDEEKKPAKRFPKTPKTRSGSHHQEDSTTSHHNRNLEG  
1281 Ta-elf6-1 LRSRGRRRVTREASVSLTETSDEEKKPAKRFPKTPKTRSGSHHQEDSTTSHHNRNLEG  
1282 \*\*\*\*\*:\*:\*.\* \*:\*:\*.\* \*\*\*\*\* \*:\*:\*:\*:\*:\*:\*:\*:\*:\*:\*:\*:\*:\*  
1283  
1284 At-ELF6 CKMTFESKAKLQTHKRNRCTHEGCGKKFRAHKYLVLHQVHQRVHNDPFCVSKGCSMTFKW  
1285 Ta-ELF6 CKMTFKSKAELQAHQRNCAHEGCGKKFRAHKYLVLHQVHNDPFCVSKGCSMTFKW  
1286 Ta-elf6-1 CKMTFKSKAELQAHQRNCAHEGCGKKFRAHKYLVLHQVHNDPFCVSKGCSMTFKW  
1287 \*\*\*\*\*:\*\*\*:\*:\*:\*:\*:\*:\*:\*:\*:\*:\*:\*:\*:\*:\*:\*:\*:\*:\*  
1288  
1289 At-ELF6 QWARTEHLRLHTGERPYICKVDGCGLSFRFVSDYSRHRRTMHHYVT  
1290 Ta-ELF6 PWARTEHLRLHTGERPYKCKVDGCGMSFRFVSDYSRHRRTMHHYVT  
1291 Ta-elf6-1 PWARTEHLRLHTGERPYKCKVDGCGMSFRFVSDYSRHRRTMHHYVT  
1292 \*\*\*\*\*:\*\*\*\*\*:\*\*\*\*\*.\*\*\*\*\*

1293 The JmjC domain is highlighted with bold lettering.

1294 **IND – INDEHISCENT (AT4G00120)**  
1295  
1296 At-IND MENGMYKKKGVCDCSCVSSKRSNSHSPKRSMMEPQPHLLMDWNKANDLLTQEHA AFLNDP  
1297 Ta-IND -----MNNWKNPNDLITQEY-PFLHDP  
1298 Ta-ind-1 -----MNNWKNPNDLITQEY-PFLHDP  
1299 Ta-ind-2 -----MNNWKNPNDLITQEY-PFLHDP  
1300 Ta-ind-3 -----MNNWKNPNDLITQEY-PFLHDP  
1301 \*:\*:\* \*:\*:\*:\*:\*:\*:\*:\*:\*:\*:\*:\*:\*:\*:\*:\*:\*:\*  
1302  
1303 At-IND HHLMLDPPPETLIHLDE-----DEEYDEDMDAMKEMQYMIAVMQPVDIDP  
1304 Ta-IND -HLMIDPPPETLSHFQPPPTLFSHGHEEEEEEDNEEEEMDAMKEMQYTIAMQPVDIDP  
1305 Ta-ind-1 -HLMIDPPPETLSHFQPPPTLFSHGHEEEEEEDNEEEEMDAMKEMQYTIAMQPVDIDP  
1306 Ta-ind-2 -HLMIDPPPETLSHFQPPPTLFSHGHEEEEEEDNEEEEMDAMKEMQYTIAMQPVDIDP  
1307 Ta-ind-3 -HLMIDPPPETLSHFQPPPTLFSHGHEEEEEEDNEEEEMDAMKEMQYTIAMQPVDIDP  
1308 \*\*\*:\*\*\*\*\* \*:: :::\*:\*:\*:\*:\*:\*:\*:\*:\*:\*:\*:\*:\*:\*:\*:\*:\*  
1309  
1310 At-IND ATVPKPNRRNVRISDDPTQTVVARRRRERISEKIRILKRIVPGGAKMDTASMLDEAIRYTK  
1311 Ta-IND ATVPKPNRRNVRVSDDTQTVVARRRREKISEKIRILKRMVPGGAKMDTASMLDEAIRYTK  
1312 Ta-ind-1 ATVPKPNRRNVRVSDDTQTVVARRRREKISEKIRILKRMVPGGAKMDTASMLDEAIRYTK  
1313 Ta-ind-2 ATVPKPNRRNVRVSDDTQTVVARRRREKISEKIRILKRMVPGGAKMDTASMLDEAIRYTK  
1314 Ta-ind-3 ATVPKPNRRNVRVSDDTQTVVARRRREKISEKIRILKRMVPGGAKMDTASMLDEAIRYTK  
1315 \*\*\* \*:\*:\*:\*:\*:\*:\*:\*:\*:\*:\*:\*:\*:\*:\*:\*:\*:\*  
1316  
1317 At-IND FLKRQVRILQPHSQIGAPMANPSYLCYHNSQP  
1318 Ta-IND FLKRQVKLLQPHSQLGAPMSDPSCLCYHNSQT  
1319 Ta-ind-1 FLKRQVKLLQPHSQLGAPMSDPSCLCYHNSQT  
1320 Ta-ind-2 FLKRQVKLLQPHSQLGAPMSDPSCLCYHNSQT  
1321 Ta-ind-3 FLKRQVKLLQPHSQLGAPMSDPSCLCYHNSQT  
1322 \*\*\*\*\*:\*:\*:\*:\*:\*:\*:\*:\*:\*:\*:\*  
1323  
1324 **AOP2 – alkenyl- and hydroxyalkyl-producing (AT4G03070)**  
1325  
1326 At-AOP2 MDSDFVPPSVSFQLPVIDFSDQNLKPGSSKWDEV TADVLKAL EDYGC FEASFDKLSVELN  
1327 Ta-AOP2 ----MGSLSNTPQLPVIYLS DQTLKPGSSKWVEVRS DVRKAL E EYGGFEVSYDRVSEELK  
1328 Ta-aop2 ----MGSLSNTPQLPVIYLS DQTLKPGSSKWVEVRS DVRKAL E EYGGFEVSYDRVSEELK  
1329 : \* : \*\*\*\*\* :\*:\*:\*:\*:\*:\*:\*:\*:\*:\* \* \* :\* \* \* \* \* \* \* \* \* \* \* \* \* \* \* \* \* \*  
1330  
1331 At-AOP2 RSVFEAMEDLFELPIPTKQRNVSSKPFHGYLCHN-LYESLGIN DANVLEK VNDFTQQLWP  
1332 Ta-AOP2 KSVLQAMEELFALPVEAKQRNVSPKPFSGYSTHNGLS ESMGIQDPHVLDK VYEFTQLLRP  
1333 Ta-aop2 KSVLQAMEELFALPVEAKQRNVSPKPFSGYSTHNGLS ESMGIQDPHVLDK VYEFTQLLRP  
1334 :\*:\*:\*:\*:\*:\* \* \* \* :\*\*\*\*\* \* \* \* \* \* \* \* \* \* \* \* \* \* \* \* \* \* \* \* \* \* \* \* \* \* \* \* \* \* \*  
1335  
1336 At-AOP2 DH--GNKSISETIHLFSEQLVELDLMVRRMIMESFGIENYIDEHLNSTYY-LTRLMKYTS  
1337 Ta-AOP2 DHCDGNKSISETIQTFSENADAGVTV-----GS--NADANANANANTSTDAGVGD S  
1338 Ta-aop2 DHCDGNKSISETIQTFSENADAGVTV-----GS--NADANANANANTSTDAGVGD S  
1339 \*\* \*\*\*\*\*:\*\*\*: : \* \* \* \* \* \* \* \* \* \* \* \* \* \* \* \* \* \* \* \* \* \* \* \* \* \* \* \* \* \*  
1340  
1341 At-AOP2 PPDDDDDDDEETKLG LRSHTDKNIIITLHQYQVDGLEVKTKDDKWIKVKPSQDSVLVMVG  
1342 Ta-AOP2 VKANGGADDVEKKLGLPSHTDKNLITVLYQYEIEGLEVLTKDDKWIRLKP SHNSFVVMAG  
1343 Ta-aop2 VKANGGADDVEKKLGLPSHTDKNLITVLYQYEIEGLEVLTKDDKWIRLKP SHNSFVVMAG  
1344 :.. \* \* \* \* \* \* \* \* \* \* \* \* \* \* \* \* \* \* \* \* \* \* \* \* \* \* \* \* \* \* \* \* \* \* \* \* \* \* \* \* \*  
1345  
1346 At-AOP2 DSLCALNGLRHSPYHRVIMTG-KKTRYSTGLFSIPKTGVII DSPEELVDKEHPRIFKPF  
1347 Ta-AOP2 DSLYALMNGRLTRPFHRVRVTEKKKTRYSIALFSAPTADYIIDTPKELVDEKHPRIFEPF  
1348 Ta-aop2 DSLYALMNGRLTRPFHRVRVTEKKKTRYSIALFSAPTADYIIDTPKELVDEKHPRIFEPF  
1349 \*\*\* \*:\*:\*:\* \*:\*:\* \* \* \* \* \* \* \* \* \* \* \* \* \* \* \* \* \* \* \* \* \* \* \* \* \* \* \* \* \* \* \* \* \* \* \*  
1350  
1351 At-AOP2 EYTDLFHFQTEAGRIAQSALHAF AAF---  
1352 Ta-AOP2 NYNDLMSFYHSEAGR KARSTLDAFC AVSRA  
1353 Ta-aop2 NYNDLMSFYHSEAGR KARSTLDAFC AVSRA

1354 :\*.\*.: \*.:\*\*\*\* \*.\*.\*.\*.\*.  
1355  
1356  
1357 **FAE1 – FATTY ACID ELONGATION1 (AT4G34520)**  
1358  
1359 At-FAE1 MTSVNVKLLLYRYVLTNFFNLCFFPLTAFLAGKASRLTINDLHNF-LSYLQHNLIITVTLLE  
1360 Ta-FAE1 MTSVNVKLLLYHYVITNFFNLCFFPLAAIVAGKASRLTTNDLHHFYYSYLQHNLIITISLLE  
1361 Ta-fae1-1 MTSVNVKLLLYHYVITNFFNLCFFPLAAIVAGKASRLTTNDLHHFYYSYLQHNLIITISLLE  
1362 Ta-fae1-2 MTSVNVKLLLYHYVITNFFNLCFFPLAAIVAGKASRLTTNDLHHFYYSYLQHNLIITISLLE  
1363 \*\*\*\*\*.\*.:\*\*\*\*\*.\*.:\*\*\*\*\*.\*.:\*\*\*\*\*.\*.:\*\*\*\*\*.\*.:\*\*\*\*\*.\*.:\*\*\*\*\*.\*.:\*\*\*\*\*.  
1364  
1365 At-FAE1 AFTVFGLVLYIVTRPNPVYLVLDYSCYLPPLHLKVS SVKVMDFYQIRKADTSSRNACDD  
1366 Ta-FAE1 AFTVFGLALYIVTRPKPVYLVLDHSCYLPPLHLRSSISKVMDIFYQVRLADP-LRNAASDD  
1367 Ta-fae1-1 AFTVFGLALYIVTRPKPVYLVLDHSCYLPPLHLRSSISKVMDIFYQVRLADP-LRNAASDD  
1368 Ta-fae1-2 AFTVFGLALYIVTRPKPVYLVLDHSCYLPPLHLRSSISKVMDIFYQVRLADP-LRNAASDD  
1369 \*\*\*\*\*.\*.:\*\*\*\*\*.\*.:\*\*\*\*\*.\*.:\*\*\*\*\*.\*.:\*\*\*\*\*.\*.:\*\*\*\*\*.\*.:\*\*\*\*\*.\*.:\*\*\*\*\*.  
1370  
1371 At-FAE1 PSSLDFLRKIQERSGLGDETYSPGLIHVPPRKTFAASREETEKVIIIGALENLFENTKVN  
1372 Ta-FAE1 SSWLDFLRKIQERSGLGDETHGPEGLLQVPPRKTFAAAREETEQVIIGALEKLFENTKVN  
1373 Ta-fae1-1 SSWLDFLRKIQERSGLGDETHGPEGLLQVPPRKTFAAAREETEQVIIGALEKLFENTKVN  
1374 Ta-fae1-2 SSWLDFLRKIQERSGLGDETHGPEGLLQVPPRKTFAAAREETEQVIIGALEKLFENTKVN  
1375 \* \*\*\*\*\*.\*.:\*\*\*\*\*.\*.:\*\*\*\*\*.\*.:\*\*\*\*\*.\*.:\*\*\*\*\*.\*.:\*\*\*\*\*.\*.:\*\*\*\*\*.  
1376  
1377 At-FAE1 PREIGILVNSSMFNPTPSLSAMVVNTFKLRSNIRSFNLGGMGCSAGVIAIDLAKDLLHV  
1378 Ta-FAE1 PKEIGILVNSSMFNPTPSLSAMVVNTFKLRSNIRSFNLGGMGCSAGVIAIDLAKDLLHV  
1379 Ta-fae1-1 PKEIGILVNSSMFNPTPSLSAMVVNTFKLRSNIRSFNLGGMGCSAGVIAIDLAKDLLHV  
1380 Ta-fae1-2 PKEIGILVNSSMFNPTPSLSAMVVNTFKLRSNIRSFNLGGMGCSAGVIAIDLAKDLLHV  
1381 \*.:\*\*\*\*\*.\*.:\*\*\*\*\*.\*.:\*\*\*\*\*.\*.:\*\*\*\*\*.\*.:\*\*\*\*\*.\*.:\*\*\*\*\*.\*.:\*\*\*\*\*.  
1382  
1383 At-FAE1 HKNTYALVSTENITQGIYAGENRSMVSNCLFRVGGAAIILSNKSGDRRRSKYKLVHTV  
1384 Ta-FAE1 HKNTYALVSTENITYNIYAGDNRSMMVSNCLFRVGGAAIILSNKPRDRRRSKYQLLHTV  
1385 Ta-fae1-1 HKNTYALVSTENITYNIYAGDNRSMMVSNCLFRVGGAAIILSNKPRDRRRSKYQLLHTV  
1386 Ta-fae1-2 HKNTYALVSTENITYNIYAGDNRSMMVSNCLFRVGGAAIILSNKPRDRRRSKYQLLHTV  
1387 \*\*\*\*\*.\*.:\*\*\*\*\*.\*.:\*\*\*\*\*.\*.:\*\*\*\*\*.\*.:\*\*\*\*\*.\*.:\*\*\*\*\*.\*.:\*\*\*\*\*.  
1388  
1389 At-FAE1 RTHTGADDKSFRCVQEDDESGKIGVCLSKDITNVAGTTLKNIATLGPLILPLSEKFLF  
1390 Ta-FAE1 RTHTGADDKSFRCVQEDDESGKIGVCLSKDITGVAGRTVCKNITTGLPLVLPFSEKFLF  
1391 Ta-fae1-1 RTHTGADDKSFRCVQEDDESGKIGVCLSKDITGVAGRTV\*-----  
1392 Ta-fae1-2 RTHTGADDKSFRCVQEDDESGKIGVCLSKDITGVAGRTVCKNITTGLPLVLPFSEKFLF  
1393 \*\*\*\*\*.\*.:\*\*\*\*\*.\*.:\*\*\*\*\*.\*.:\*\*\*\*\*.\*.:\*\*\*\*\*.\*.:\*\*\*\*\*.\*.:\*\*\*\*\*.  
1394  
1395 At-FAE1 FATFVAKLLKDKIKHYVPDFKLAIDHFCIHAGGRAVIDELEKNLGLSPIDVEASRSTL  
1396 Ta-FAE1 FVTFIAKKLFDKIKHYVPDFKLAIDHFCIHAGGRAVIDVLQKNLGLLPIDVEASRSTL  
1397 Ta-fae1-1 -----  
1398 Ta-fae1-2 FVTFIAKKLFDKIKHYVPDFKLAIDHFCIHAGGRAVIDVLQKNLGLLPIDVEASRSTL  
1399  
1400  
1401 At-FAE1 HRFGNTSSSSIWYELAYIEAKGRMKGNKVAQIALGSGFKCNSAVWVALRNVKASANS PW  
1402 Ta-FAE1 HRFGNTSSSSIWYELAYIEAKGRMKRGNKVAQIALGSGFKCNSAVWVALRNVKASTNS PW  
1403 Ta-fae1-1 -----  
1404 Ta-fae1-2 HRFGNTSSSSIWYELAYIEAKGRMKRGNKV-----  
1405  
1406  
1407 At-FAE1 QHCIDRYPVKIDSLSKSKTHVQNGRS-  
1408 Ta-FAE1 EHCIDRYPDAIDSDSGKSETRVQNGRS\*  
1409 Ta-fae1-1 -----  
1410 Ta-fae1-2 -----  
1411  
1412

1413 **ROD1 – REDUCED OLEATE DESATURATION 1 (AT3G15820)**  
1414  
1415 At-ROD1 MSAAAAETDVS LRRRSNSLNGNHTNGVAIDGTLDN -NNRRVGDNTNTHMDISAKKTDNGYA  
1416 Ta-ROD1 ---MSTKTVVPLRRRSKPLNGNHTNGVAIDGSLDDDHNRRI GSVNSQMDNIAKKTDDGYA  
1417 Ta-rod1-1 ---MSTKTVVPLRRRSKPLNGNHTNGVAIDGSLDDDHNRRI GSVNSQMDNIAKKTDDGYA  
1418 Ta-rod1-2 ---MSTKTVVPLRRRSKPLNGNHTNGVAIDGSLDDDHNRRI GSVNSQMDNIAKKTDDGYA  
1419 :::\* \* \*\*\*\*\*: \*\*\*\*\*:\*\*\*: :\*\*\*:\*. .\*:\*\* \*\*\*\*\*:\*\*\*  
1420  
1421 At-ROD1 NGVGG -GGWRSKASFTTWTARDIVVYVRYHWIPCMFAAGLLFFMGVEYTLQMIPARSEPF  
1422 Ta-ROD1 NGGGGGGGKSKASFMTWTARDVVYVARYHWIPCLFAVGVLFFTGVEYTLQMIPARSEPF  
1423 Ta-rod1-1 NGGGGGGGKSKASFMTWTARDVVYVARYHWIPCLFAVGVLFFTGVEYTLQMIPARSEPF  
1424 Ta-rod1-2 NGGGGGGGKSKASFMTWTARDVVYVARYHWIPCLFAVGVLFFTGVEYTLQMIPARSEPF  
1425 \*\* \* \* \* .\*\*\*\*\* \*\*\*\*\*:\*\*\*. \*\*\*\*\*:\*. \* .\*\*\* \*\*\*\*\*  
1426  
1427 At-ROD1 DLGFVTRSLNRVLASSPDLNTVLAALNTVFVGMQTTYIVWTWLVEGRARATIAALFMFT  
1428 Ta-ROD1 DIGFVATRSLNRVLANSPLDNTVLAALNTVFVGMQTTYIVWTWLMGRPRATISACFMFT  
1429 Ta-rod1-1 DIGFVATRSLNRVLANSPLDNTVLAALNTVFVGMQTTYIVWTWLMGRPRATISACFMFT  
1430 Ta-rod1-2 DIGFVATRSLNRVLANSPLDNTVLAALNTVFVGMQTTYIVWTWLMGRPRATISACFMFT  
1431 \*:\*\*\*.\*\*\*\*\*.\*\*\*\*\*:\*\*\*\*\*:\*\*\* \*\*\*\*\*: \* \*\*\*\*  
1432  
1433 At-ROD1 CRGILGYSTQLPLPQDFLGSGVDFPVGNSFFLFYSGHVAGSMIASLDYRRMQRLRLAMV  
1434 Ta-ROD1 CRGILGYSTQLPLPQDFLGSGVDFPVGNSFFLFYSGHVAGSMIASLDYRRMQRMRLAML  
1435 Ta-rod1-1 CRGILGYSTQLPLPQDFLGSGVDFPVGNSFFLFYSGHVAGSMIASLDYRRMQRMRLAML  
1436 Ta-rod1-2 CRGILGYSTQLPLPQDFLGSGVDFPVGNSFFLFYSGHVAGSMIASLDYRRMQRMRLAML  
1437 \*\*\*\*\*:\*\*\*\*\*:\*\*\*\*\*:\*\*\*\*\*:\*\*\*\*\*:\*\*\*\*\*:\*\*\*\*\*:\*\*\*\*\*:  
1438  
1439 At-ROD1 FDILNVLQSI LLGTRGHYIDLAVGVGAGILFDSLAGKYEEMMSKRH -LGTGFLISKD  
1440 Ta-ROD1 FDILNVLQSI LLGTRGHYIDLAVGVGAGILFDSFAGKYEEMISKRHNLVNGFGLISKD  
1441 Ta-rod1-1 FDILNVLQSI LLGTRGHYIDLAVGVGAGILFDSFAGKYEEMISKRHNLVNGFGLISKD  
1442 Ta-rod1-2 FDILNVLQSI LLGTRGHYIDLAVGVGAGILFDSFAGKYEEMISKRHNLVNGFGLISKD  
1443 \*\*\*\*\*:\*\*\*\*\*:\*\*\*\*\*:\*\*\*\*\*:\*\*\*\*\*:\*\*\*\*\*:\*\*\*\*\*:\*\*\*\*\*:  
1444  
1445 At-ROD1 SLVN-  
1446 Ta-ROD1 SLVN\*  
1447 Ta-rod1-1 SLVN\*  
1448 Ta-rod1-2 SLVN\*  
1449 \*\*\*\*  
1450  
1451  
1452  
1453  
1454
